# Supplementary material
Source: PubMed Central journal article supplement (PMC3675996)
Supplement: EC.00048-13_zek007134114so2.pdf [file EC.00048-13_zek007134114so2.pdf]

## Supplementary Tables

Table S1. List of plasmids used in the present study.

| Plasmid        | Description /genotype                                                                                                                                                                                                                                                                                                  | Reference  |
|----------------|------------------------------------------------------------------------------------------------------------------------------------------------------------------------------------------------------------------------------------------------------------------------------------------------------------------------|------------|
| pACT1-GFP      | pACT-GFP vector contains the codon-optimized yeast enhanced green fluorescent protein as reporter whose expression is driven by <i>CaACT1</i> promoter. pACT-GFP is based on parent plasmid Clp10 which provides homology for integration of target GFP-tagged genes at chromosomal RPS1 locus in <i>C. albicans</i> . | 19         |
| pACT1-SRR1-GFP | Reporter construct in which, 846 bp <i>SRR1</i> lacking a stop codon was amplified and cloned into HindIII site of pACT1-GFP. Resulting vector expresses a GFP tagged Srr1 protein.                                                                                                                                    | This study |

Table S2. List of primers used in the present study.

| Primer name | Sequence                                  | Restriction Site(s) |
|-------------|-------------------------------------------|---------------------|
| SRR1-GFP-F  | ATCATTCAAAAAGCTTATGATATCCATGAACCCAATTATGA | HindIII             |
| SRR1-GFP-R  | CTTTAGACATAAGCTTTATTTTGTTTTTTCTTGTTATA    | HindIII             |
| Actin-RT-F  | ACGGTGAAGTTGCTGCTTTAGTT                   | -                   |
| Actin-RT-R  | CGTCGTCACCGGCAAAA                         | -                   |
| MAM33-RT-F  | TCTATCGCACATACCTGACCGCTT                  | -                   |
| MAM33-RT-R  | CCACCGCATCGTCGGTGATATTTA                  | -                   |
| MCD1-RT-F   | ACAAAGAGCGAACTACCGGAGACA                  | -                   |
| MCD1-RT-R   | GAATGGCCAAACCTTCCATTGCCT                  | -                   |
| MRF1-RT-F   | TGCTGGGAATTCTCAAGCCAGT                    | -                   |

|                 |                          |   |
|-----------------|--------------------------|---|
| MRF1-RT-R       | TGACCAATCCACCTACAGTTTCCC | - |
| GOA1-RT-F       | ACGTGCACCCACGGTATTACATCA | - |
| GOA1-RT-R       | CTGGTTATCTCGTCTTCAACGCCA | - |
| orf19.2175-RT-F | AGACCTTTGCCCTCATTTC      | - |
| orf19.2175-RT-R | GACATTGACTCTCTCGCCATT    | - |
| orf19.7365-RT-F | GGCAATGACGACTACGATGAT    | - |
| orf19.7365-RT-R | GTGGTGTTAGTGTTGGTTGTTG   | - |
