# Supplementary material
Source: PubMed Central journal article supplement (PMC3675996)
Supplement: EC.00048-13_zek007134114so3.pdf [file EC.00048-13_zek007134114so3.pdf]

Table S3.SRR1-dependent Oxidative Stress Responsive Genes

| orf19 Designation | Gene Name    | Molecular Function                                                      | Fold Changes (treated vs. untreated) |       |             |       |
|-------------------|--------------|-------------------------------------------------------------------------|--------------------------------------|-------|-------------|-------|
|                   |              |                                                                         | SRR1/SRR1                            |       | ?srr1/?srr1 |       |
|                   |              |                                                                         | Exp 1                                | Exp2  | Exp 1       | Exp 2 |
| orf19.113         | <i>CIP1</i>  | Unknown                                                                 | 217.4                                | 444.2 | 44.2        | 112.0 |
| orf19.3121        | <i>GST1</i>  | transcription corepressor activity                                      | 153.9                                | 449.2 | 58.9        | 43.8  |
| orf19.1763        | <i>IFR1</i>  | Unknown                                                                 | 59.0                                 | 218.8 | 27.2        | 41.8  |
| orf19.3122        | <i>ARR3</i>  | arsenite transmembrane transporter activity                             | 44.8                                 | 78.9  | 18.5        | 20.2  |
| orf19.720         | <i>GST3</i>  | transcription corepressor activity                                      | 43.7                                 | 72.6  | 4.4         | 15.5  |
| orf19.3150        | <i>GRE2</i>  | oxidoreductase activity                                                 | 42.5                                 | 63.3  | 8.4         | 10.9  |
| orf19.4474        |              | Unknown                                                                 | 35.5                                 | 57.8  | 9.9         | 29.0  |
| orf19.3234        |              | NADPH dehydrogenase activity                                            | 34.6                                 | 61.5  | 15.5        | 20.1  |
| orf19.3131        | <i>OYE32</i> | NADPH dehydrogenase activity                                            | 25.3                                 | 39.2  | 8.6         | 8.1   |
| orf19.4970        |              | Unknown                                                                 | 23.8                                 | 89.2  | 5.0         | 5.7   |
| orf19.87          | <i>GPX1</i>  | glutathione peroxidase activity                                         | 20.4                                 | 6.3   | 2.6         | 1.7   |
| orf19.2244        |              | Unknown                                                                 | 18.4                                 | 22.6  | 5.7         | 7.9   |
| orf19.7320        | <i>LIP7</i>  | lipase activity                                                         | 18.4                                 | 7.4   | 2.2         | 2.3   |
| orf19.6999        |              | Unknown                                                                 | 18.3                                 | 118.9 | 4.9         | 3.3   |
| orf19.3309        |              | Unknown                                                                 | 17.6                                 | 18.4  | 5.8         | 5.5   |
| orf19.2262        |              | AU-rich element binding, NADPH:quinone reductase activity               | 16.9                                 | 21.8  | 7.4         | 10.4  |
| orf19.6595        | <i>RTA4</i>  | phospholipid-translocating ATPase activity                              | 15.7                                 | 39.8  | 2.4         | 3.3   |
| orf19.2933        |              | ubiquitin-specific protease activity                                    | 15.4                                 | 21.2  | 5.7         | 7.7   |
| orf19.7469        | <i>ARG1</i>  | argininosuccinate synthase activity                                     | 14.7                                 | 23.1  | 3.0         | 3.2   |
| orf19.6997        |              | Unknown                                                                 | 14.3                                 | 22.2  | 4.0         | 3.8   |
| orf19.2515        |              | Unknown                                                                 | 13.7                                 | 25.0  | 3.3         | 3.7   |
| orf19.1126        |              | Unknown                                                                 | 13.0                                 | 15.3  | 1.5         | 3.4   |
| orf19.6781        |              | transcription factor activity                                           | 12.7                                 | 26.5  | 4.3         | 6.3   |
| orf19.5498        | <i>EFH1</i>  | transcription factor activity                                           | 12.7                                 | 23.4  | 1.6         | 0.7   |
| orf19.6947        | <i>GTT11</i> | glutathione transferase activity                                        | 11.9                                 | 14.5  | 4.6         | 5.8   |
| orf19.5877        | <i>ATF1</i>  | alcohol O-acetyltransferase activity                                    | 11.4                                 | 13.8  | 4.9         | 6.0   |
| orf19.847         | <i>YIM1</i>  | endopeptidase activity                                                  | 11.2                                 | 15.2  | 4.4         | 4.8   |
| orf19.3021        |              | Unknown                                                                 | 11.0                                 | 26.9  | 2.9         | 3.0   |
| orf19.1406        |              | Unknown                                                                 | 10.6                                 | 15.4  | 5.1         | 7.7   |
| orf19.2346        |              | Unknown                                                                 | 10.2                                 | 11.6  | 4.5         | 5.3   |
| orf19.3588        |              | Unknown                                                                 | 10.1                                 | 10.1  | 3.2         | 4.5   |
| orf19.5094        | <i>BUL1</i>  | Unknown                                                                 | 9.8                                  | 17.7  | 2.9         | 3.3   |
| orf19.3282        | <i>BMT3</i>  | Unknown                                                                 | 9.8                                  | 12.6  | 2.8         | 2.9   |
| orf19.1149        | <i>MRF1</i>  | DNA binding                                                             | 9.6                                  | 12.4  | 2.7         | 2.6   |
| orf19.2480.1      | <i>AUT7</i>  | Unknown                                                                 | 9.3                                  | 17.6  | 3.6         | 5.1   |
| orf19.896         | <i>CHK1</i>  | two-component sensor activity, osmosensor activity                      | 9.0                                  | 16.0  | 1.9         | 3.7   |
| orf19.6311        |              | Unknown                                                                 | 9.0                                  | 25.8  | 1.0         | 3.8   |
| orf19.7531        |              | Unknown                                                                 | 8.9                                  | 9.4   | 3.6         | 3.8   |
| orf19.2769        |              | endopeptidase inhibitor activity                                        | 8.5                                  | 10.1  | 1.7         | 2.2   |
| orf19.6139        | <i>FRE7</i>  | ferric-chelate reductase activity                                       | 8.3                                  | 15.7  | 3.4         | 2.6   |
| orf19.419         |              | Unknown                                                                 | 8.2                                  | 22.6  | 4.2         | 4.2   |
| orf19.4307        |              | Unknown                                                                 | 8.1                                  | 11.4  | 3.0         | 5.8   |
| orf19.7442        |              | Unknown                                                                 | 7.8                                  | 5.7   | 1.5         | 1.1   |
| orf19.4411        | <i>HOS1</i>  | histone deacetylase activity                                            | 7.8                                  | 8.3   | 2.9         | 3.0   |
| orf19.1504        |              | Unknown                                                                 | 7.6                                  | 7.4   | 2.1         | 3.2   |
| orf19.6196        |              | Unknown                                                                 | 7.6                                  | 10.6  | 3.5         | 4.2   |
| orf19.803         |              | 4-aminobutyrate transaminase activity                                   | 7.5                                  | 16.3  | 3.1         | 2.8   |
| orf19.7393        |              | NADH kinase activity                                                    | 7.4                                  | 6.9   | 2.4         | 2.5   |
| orf19.6605        |              | Unknown                                                                 | 7.3                                  | 12.8  | 3.1         | 5.7   |
| orf19.1277        |              | Unknown                                                                 | 7.2                                  | 16.8  | 2.3         | 2.2   |
| orf19.1359        |              | Unknown                                                                 | 7.2                                  | 7.1   | 3.5         | 3.5   |
| orf19.6306        |              | aldehyde dehydrogenase (NAD) activity                                   | 7.0                                  | 12.1  | 3.0         | 2.7   |
| orf19.5610        | <i>ARG3</i>  | ornithine carbamoyltransferase activity                                 | 6.9                                  | 8.1   | 0.7         | 1.0   |
| orf19.6148        |              | structural constituent of cytoskeleton                                  | 6.9                                  | 9.0   | 1.9         | 2.9   |
| orf19.782         |              | Unknown                                                                 | 6.9                                  | 16.1  | 2.0         | 3.5   |
| orf19.771         | <i>LPG20</i> | aryl-alcohol dehydrogenase activity                                     | 6.8                                  | 5.7   | 2.0         | 1.9   |
| orf19.2812        |              | Unknown                                                                 | 6.7                                  | 5.4   | 0.6         | 0.9   |
| orf19.6508        |              | protein transporter activity                                            | 6.7                                  | 17.4  | 1.9         | 3.6   |
| orf19.2210        |              | Unknown                                                                 | 6.6                                  | 2.9   | 1.1         | 1.5   |
| orf19.3771        | <i>ARG8</i>  | N2-acetyl-L-ornithine:2-oxoglutarate 5-aminotransferase activity        | 6.6                                  | 7.7   | 0.7         | 0.6   |
| orf19.2693        | <i>GST2</i>  | transcription corepressor activity                                      | 6.4                                  | 8.4   | 2.8         | 3.3   |
| orf19.7381        | <i>ZCF37</i> | transcription factor activity                                           | 6.4                                  | 6.1   | 2.2         | 2.1   |
| orf19.2028        | <i>MXR1</i>  | peptide-methionine-(S)-S-oxide reductase activity                       | 6.3                                  | 16.2  | 2.5         | 5.8   |
| orf19.2784        |              | Unknown                                                                 | 6.2                                  | 2.6   | 0.5         | 1.2   |
| orf19.822         |              | Unknown                                                                 | 6.1                                  | 41.0  | 3.1         | 4.5   |
| orf19.6758        |              | aldo-keto reductase activity                                            | 6.0                                  | 8.1   | 1.1         | 1.8   |
| orf19.6706        | <i>GYP7</i>  | Rab GTPase activator activity                                           | 6.0                                  | 6.1   | 1.6         | 2.1   |
| orf19.5809        |              | arylformamidase activity, kynurenine-oxoglutarate transaminase activity | 5.9                                  | 7.5   | 2.7         | 2.7   |
| orf19.916         |              | Unknown                                                                 | 5.9                                  | 8.9   | 2.0         | 2.9   |
| orf19.7043        |              | Unknown                                                                 | 5.9                                  | 4.1   | 0.6         | 1.4   |
| orf19.6844        | <i>ICL1</i>  | isocitrate lyase activity                                               | 5.8                                  | 25.2  | 3.0         | 9.1   |
| orf19.7585        | <i>INO1</i>  | inositol-3-phosphate synthase activity                                  | 5.8                                  | 8.2   | 1.1         | 0.8   |
| orf19.1789.1      | <i>LYS1</i>  | saccharopine dehydrogenase (NAD+, L-lysine-forming) activity            | 5.8                                  | 6.8   | 1.1         | 1.4   |
| orf19.337         |              | Unknown                                                                 | 5.7                                  | 8.1   | 2.2         | 3.5   |
| orf19.4072        | <i>IFF6</i>  | Unknown                                                                 | 5.7                                  | 3.4   | 2.6         | 1.7   |
| orf19.5924        | <i>ZCF31</i> | Unknown                                                                 | 5.7                                  | 4.8   | 2.0         | 1.9   |
| orf19.2982        |              | kinase activator activity                                               | 5.7                                  | 12.9  | 2.8         | 3.1   |
| orf19.3818        | <i>GOA1</i>  | Unknown                                                                 | 5.6                                  | 5.2   | 1.2         | 1.3   |
| orf19.103         | <i>KAR5</i>  | Unknown                                                                 | 5.5                                  | 25.9  | 0.9         | 1.4   |
| orf19.5614        |              | ribonuclease H activity                                                 | 5.5                                  | 8.0   | 2.2         | 2.5   |
| orf19.5662        | <i>PEP7</i>  | phosphatidylinositol 3-phosphate binding                                | 5.5                                  | 5.0   | 2.6         | 2.2   |
| orf19.6606        |              | Unknown                                                                 | 5.4                                  | 5.9   | 1.9         | 2.4   |
| orf19.3507        | <i>MCR1</i>  | cytochrome-b5 reductase activity                                        | 5.3                                  | 5.1   | 1.8         | 1.8   |
| orf19.4795        |              | Unknown                                                                 | 5.3                                  | 8.1   | 0.7         | 0.8   |
| orf19.94          |              | Unknown                                                                 | 5.2                                  | 6.5   | 0.6         | 0.5   |
| orf19.4658        |              | Unknown                                                                 | 5.2                                  | 7.3   | 2.4         | 2.7   |
| orf19.376         |              | Unknown                                                                 | 5.2                                  | 3.6   | 1.6         | 1.8   |
| orf19.5876        |              | Unknown                                                                 | 5.1                                  | 11.2  | 2.3         | 3.5   |
| orf19.5250        |              | Unknown                                                                 | 5.1                                  | 6.0   | 2.0         | 2.7   |
| orf19.6287        | <i>AAT21</i> | L-aspartate:2-oxoglutarate aminotransferase activity                    | 5.1                                  | 5.6   | 2.2         | 2.3   |
| orf19.6757        | <i>GCY1</i>  | aldehyde reductase activity                                             | 5.1                                  | 7.0   | 2.0         | 3.3   |
| orf19.5587        |              | Unknown                                                                 | 5.1                                  | 4.9   | 1.6         | 1.2   |
| orf19.4368        |              | Unknown                                                                 | 5.0                                  | 6.0   | 2.4         | 2.6   |
| orf19.1297        |              | Unknown                                                                 | 5.0                                  | 2.8   | 0.9         | 0.9   |
| orf19.27          |              | Unknown                                                                 | 5.0                                  | 3.0   | 0.7         | 0.7   |
| orf19.716         |              | Unknown                                                                 | 5.0                                  | 6.8   | 1.4         | 1.3   |

|                   |           |                                                                 | Fold Changes (treated vs. untreated) |      |             |       |
|-------------------|-----------|-----------------------------------------------------------------|--------------------------------------|------|-------------|-------|
| orf19 Designation | Gene Name | Molecular Function                                              | SRR1/SRR1                            |      | Asrr1/Asrr1 |       |
|                   |           |                                                                 | Exp 1                                | Exp2 | Exp 1       | Exp 2 |
| orf19.4543        | UGA2      | succinate-semialdehyde dehydrogenase [NAD(P)+] activity         | 5.0                                  | 5.1  | 2.2         | 2.1   |
| orf19.3605        |           | Unknown                                                         | 5.0                                  | 5.4  | 1.4         | 1.5   |
| orf19.697         |           | Unknown                                                         | 5.0                                  | 4.6  | 1.8         | 2.0   |
| orf19.6793        |           | Unknown                                                         | 4.9                                  | 9.9  | 2.4         | 2.2   |
| orf19.7204        |           | Unknown                                                         | 4.9                                  | 8.9  | 1.5         | 2.9   |
| orf19.1392        |           | chaperone binding, protein disulfide isomerase activity         | 4.9                                  | 3.2  | 1.9         | 1.5   |
| orf19.2738        | SUL2      | sulfate transmembrane transporter activity                      | 4.8                                  | 5.8  | 1.5         | 1.3   |
| orf19.3508        |           | Unknown                                                         | 4.8                                  | 5.7  | 0.7         | 0.7   |
| orf19.3123.2      |           | cytidine deaminase activity                                     | 4.8                                  | 6.3  | 2.0         | 2.5   |
| orf19.6126        | KGD2      | dihydropyrimidinase activity                                    | 4.8                                  | 5.5  | 2.5         | 2.1   |
| orf19.5387        | VPS8      | Unknown                                                         | 4.8                                  | 5.0  | 2.2         | 1.4   |
| orf19.5169        |           | amidase activity                                                | 4.6                                  | 4.6  | 1.8         | 1.5   |
| orf19.4145        | ZCF20     | specific RNA polymerase II transcription factor activity        | 4.6                                  | 6.2  | 2.3         | 2.6   |
| orf19.7187        | MAM33     | Unknown                                                         | 4.6                                  | 5.2  | 1.7         | 2.0   |
| orf19.2921        |           | alpha-tubulin binding, chaperone binding                        | 4.5                                  | 3.7  | 2.0         | 1.8   |
| orf19.1255        | ZCF5      | transcription factor activity                                   | 4.5                                  | 4.5  | 2.3         | 2.1   |
| orf19.183         | HIS3      | imidazoleglycerol-phosphate dehydratase activity                | 4.5                                  | 6.5  | 1.5         | 3.0   |
| orf19.4119        | SPO72     | Unknown                                                         | 4.5                                  | 5.4  | 2.2         | 2.0   |
| orf19.6048        |           | dolichyl-phosphate-mannose-protein mannosyltransferase activity | 4.5                                  | 5.0  | 2.2         | 1.7   |
| orf19.6724        | FUM12     | fumarate hydratase activity                                     | 4.5                                  | 5.9  | 1.3         | 1.0   |
| orf19.4800        | RIM20     | Unknown                                                         | 4.5                                  | 4.1  | 2.2         | 2.1   |
| orf19.5784        |           | Unknown                                                         | 4.4                                  | 4.0  | 1.8         | 2.0   |
| orf19.1767        |           | ubiquitin-specific protease activity                            | 4.4                                  | 5.8  | 2.2         | 2.8   |
| orf19.1266        |           | Unknown                                                         | 4.4                                  | 2.9  | 1.0         | 0.9   |
| orf19.7210        |           | Unknown                                                         | 4.4                                  | 5.3  | 2.1         | 2.3   |
| orf19.5059        | GCS1      | glutamate-cysteine ligase activity                              | 4.4                                  | 7.3  | 2.2         | 3.3   |
| orf19.6385        | ACO1      | aconitate hydratase activity, DNA binding                       | 4.4                                  | 4.4  | 1.9         | 1.8   |
| orf19.3435        |           | Unknown                                                         | 4.3                                  | 17.8 | 0.8         | 0.7   |
| orf19.897         |           | protein binding                                                 | 4.3                                  | 6.5  | 2.2         | 3.2   |
| orf19.2870        |           | Unknown                                                         | 4.3                                  | 6.4  | 1.2         | 2.0   |
| orf19.864         |           | protein binding                                                 | 4.3                                  | 2.5  | 1.5         | 1.1   |
| orf19.7032        |           | Unknown                                                         | 4.2                                  | 5.5  | 1.2         | 1.6   |
| orf19.6168        |           | structural constituent of cytoskeleton                          | 4.2                                  | 2.8  | 2.1         | 1.4   |
| orf19.3425        |           | Unknown                                                         | 4.2                                  | 4.2  | 1.5         | 1.0   |
| orf19.5634        | FRP1      | ferric-chelate reductase activity                               | 4.2                                  | 3.7  | 1.3         | 0.9   |
| orf19.2461        | PRN4      | Unknown                                                         | 4.2                                  | 7.3  | 2.1         | 2.7   |
| orf19.2517        |           | drug transporter activity                                       | 4.2                                  | 2.5  | 1.3         | 0.8   |
| orf19.6725        | FUM12     | fumarate hydratase activity                                     | 4.2                                  | 2.7  | 1.3         | 1.3   |
| orf19.6464        |           | Unknown                                                         | 4.1                                  | 6.3  | 1.8         | 2.7   |
| orf19.1325        | ECM38     | protein-glutamine gamma-glutamyltransferase activity            | 4.1                                  | 2.1  | 1.2         | 0.3   |
| orf19.4527        | HGT1      | glucose transmembrane transporter activity                      | 4.1                                  | 8.1  | 2.0         | 2.6   |
| orf19.2646        | ZCF13     | specific RNA polymerase II transcription factor activity        | 4.1                                  | 4.2  | 1.5         | 2.1   |
| orf19.5158        |           | Unknown                                                         | 4.1                                  | 5.4  | 1.8         | 2.3   |
| orf19.3659        |           | Unknown                                                         | 4.1                                  | 6.8  | 2.0         | 2.5   |
| orf19.4056        | GAT2      | transcription factor activity                                   | 4.1                                  | 6.3  | 1.8         | 2.2   |
| orf19.740         | HAP41     | transcription activator activity                                | 4.0                                  | 7.6  | 1.9         | 2.2   |
| orf19.1375        | LEU42     | 2-isopropylmalate synthase activity                             | 4.0                                  | 7.7  | 1.9         | 1.7   |
| orf19.2770        |           | Unknown                                                         | 4.0                                  | 4.3  | 1.0         | 1.1   |
| orf19.2952        | EXG2      | glucan 1,3-beta-glucosidase activity                            | 4.0                                  | 3.6  | 1.3         | 1.4   |
| orf19.5741        | ALS1      | protein binding, cell adhesion molecule binding                 | 4.0                                  | 15.4 | 1.6         | 1.5   |
| orf19.7184        |           | Unknown                                                         | 4.0                                  | 4.5  | 1.7         | 2.2   |
| orf19.7053        | GAC1      | protein phosphatase type 1 regulator activity                   | 4.0                                  | 5.6  | 0.9         | 0.6   |
| orf19.5846        |           | general RNA polymerase II transcription factor activity         | 4.0                                  | 3.4  | 1.5         | 1.4   |
| orf19.5426        |           | triglyceride lipase activity                                    | 3.9                                  | 3.0  | 1.9         | 1.5   |
| orf19.6704        |           | Unknown                                                         | 3.9                                  | 4.3  | 1.1         | 1.6   |
| orf19.7436.1      | ECM15     | Unknown                                                         | 3.9                                  | 3.9  | 1.2         | 1.3   |
| orf19.589         |           | GTPase activity, GTP binding                                    | 3.9                                  | 5.4  | 2.0         | 2.4   |
| orf19.4135        | PRC2      | Unknown                                                         | 3.9                                  | 3.7  | 1.1         | 0.8   |
| orf19.4655        | OPT6      | oligopeptide transporter activity                               | 3.9                                  | 2.8  | 1.1         | 1.0   |
| orf19.1990        | SNX4      | phosphatidylinositol 3-phosphate binding                        | 3.9                                  | 5.2  | 1.7         | 1.6   |
| orf19.5974        | ATG9      | Unknown                                                         | 3.8                                  | 5.1  | 1.1         | 1.4   |
| orf19.4324        |           | Unknown                                                         | 3.8                                  | 4.2  | 0.8         | 1.5   |
| orf19.6522        |           | anion:cation symporter activity                                 | 3.8                                  | 4.9  | 1.7         | 2.0   |
| orf19.5867        | WSC1      | Unknown                                                         | 3.8                                  | 3.2  | 1.0         | 1.4   |
| orf19.7158        |           | anion:cation symporter activity                                 | 3.8                                  | 5.0  | 1.7         | 1.8   |
| orf19.5813        |           | Unknown                                                         | 3.8                                  | 7.4  | 1.5         | 3.7   |
| orf19.2344        | ASR1      | Unknown                                                         | 3.8                                  | 6.1  | 0.6         | 0.5   |
| orf19.6993        | GAP2      | polyamine transmembrane transporter activity                    | 3.8                                  | 5.2  | 1.4         | 1.3   |
| orf19.5961        |           | Unknown                                                         | 3.8                                  | 6.2  | 1.9         | 2.4   |
| orf19.6305        |           | threonine aldolase activity                                     | 3.8                                  | 4.0  | 1.5         | 1.6   |
| orf19.3439        |           | Unknown                                                         | 3.7                                  | 8.1  | 1.3         | 2.4   |
| orf19.3851        |           | Unknown                                                         | 3.7                                  | 2.5  | 1.2         | 0.6   |
| orf19.1296        |           | RNA splicing factor activity, transesterification mechanism     | 3.7                                  | 2.1  | 0.3         | 0.9   |
| orf19.6058        | GLO1      | lactoylglutathione lyase activity                               | 3.7                                  | 4.8  | 1.9         | 2.1   |
| orf19.1159        |           | homoserine O-acetyltransferase activity                         | 3.7                                  | 3.4  | 1.4         | 1.0   |
| orf19.670.2       |           | Unknown                                                         | 3.7                                  | 6.5  | 0.9         | 1.2   |
| orf19.4979        | KNS1      | protein serine/threonine kinase activity                        | 3.7                                  | 7.9  | 0.8         | 1.3   |
| orf19.931         |           | Unknown                                                         | 3.7                                  | 4.5  | 1.8         | 1.5   |
| orf19.996         |           | adenylate cyclase activity                                      | 3.7                                  | 3.5  | 0.8         | 0.5   |
| orf19.6788        |           | Unknown                                                         | 3.6                                  | 73.3 | 1.6         | 1.9   |
| orf19.541         |           | Unknown                                                         | 3.6                                  | 4.2  | 1.3         | 1.5   |
| orf19.4864        |           | serine hydrolase activity                                       | 3.6                                  | 3.8  | 0.8         | 1.1   |
| orf19.3369        | MOH1      | Unknown                                                         | 3.6                                  | 21.8 | 1.8         | 2.5   |
| orf19.4177        | HIS5      | histidinol-phosphate transaminase activity                      | 3.5                                  | 3.6  | 1.4         | 1.4   |
| orf19.7521        | REP1      | Unknown                                                         | 3.5                                  | 2.5  | 1.2         | 1.0   |
| orf19.4114        | FAA2-1    | long-chain-fatty-acid-CoA ligase activity                       | 3.5                                  | 3.6  | 1.8         | 1.1   |
| orf19.6680        | FGR27     | transcription factor activity                                   | 3.5                                  | 3.0  | 1.6         | 1.3   |
| orf19.1339        | CPY1      | carboxypeptidase activity                                       | 3.5                                  | 2.6  | 1.6         | 1.3   |
| orf19.6043        |           | D-lactate dehydrogenase (cytochrome) activity                   | 3.4                                  | 3.4  | 1.4         | 1.2   |
| orf19.6493        |           | Unknown                                                         | 3.4                                  | 12.0 | 0.8         | 3.5   |
| orf19.2047        |           | Unknown                                                         | 3.4                                  | 3.1  | 0.9         | 0.9   |
| orf19.1529        |           | Unknown                                                         | 3.4                                  | 4.1  | 1.0         | 0.7   |
| orf19.4816        |           | Unknown                                                         | 3.4                                  | 3.3  | 1.3         | 1.3   |
| orf19.6941        |           | diacylglycerol O-acyltransferase activity                       | 3.4                                  | 3.7  | 1.0         | 0.8   |
| orf19.7365        |           | Unknown                                                         | 3.4                                  | 3.0  | 1.0         | 0.9   |
| orf19.4859        |           | Rab guanyl-nucleotide exchange factor activity                  | 3.3                                  | 7.3  | 1.7         | 1.5   |

| orf19 Designation | Gene Name | Molecular Function                                                               | Fold Changes (treated vs. untreated) |      |             |       |
|-------------------|-----------|----------------------------------------------------------------------------------|--------------------------------------|------|-------------|-------|
|                   |           |                                                                                  | SRR1/SRR1                            |      | Δsrr1/Δsrr1 |       |
|                   |           |                                                                                  | Exp 1                                | Exp2 | Exp 1       | Exp 2 |
| orf19.2623        |           | transcription factor activity                                                    | 3.3                                  | 3.2  | 1.3         | 1.6   |
| orf19.3644        |           | Unknown                                                                          | 3.3                                  | 5.1  | 1.6         | 2.3   |
| orf19.1365        |           | Unknown                                                                          | 3.3                                  | 3.2  | 1.2         | 1.1   |
| orf19.1107        |           | Unknown                                                                          | 3.3                                  | 8.3  | 1.5         | 1.7   |
| orf19.4898        |           | Unknown                                                                          | 3.3                                  | 3.8  | 1.2         | 1.4   |
| orf19.3794        | CSR1      | DNA binding, specific RNA polymerase II transcription factor activity            | 3.3                                  | 4.1  | 1.0         | 1.7   |
| orf19.4253        |           | Ras GTPase activator activity                                                    | 3.3                                  | 2.7  | 1.1         | 1.1   |
| orf19.629         | IFD7      | Unknown                                                                          | 3.3                                  | 7.2  | 1.1         | 2.5   |
| orf19.1785        |           | Unknown                                                                          | 3.3                                  | 4.3  | 1.3         | 1.7   |
| orf19.5003        |           | GTPase regulator activity, protein binding                                       | 3.3                                  | 3.4  | 1.4         | 1.7   |
| orf19.313         | DAL4      | allantoin uptake transmembrane transporter activity                              | 3.3                                  | 3.7  | 1.4         | 1.0   |
| orf19.2836        |           | Unknown                                                                          | 3.2                                  | 5.4  | 0.8         | 1.2   |
| orf19.4905        |           | Unknown                                                                          | 3.2                                  | 2.7  | 1.6         | 1.2   |
| orf19.448         |           | Unknown                                                                          | 3.2                                  | 4.0  | 1.2         | 1.8   |
| orf19.2361        |           | histone acetyltransferase activity, sequence-specific DNA binding                | 3.2                                  | 4.1  | 1.1         | 1.7   |
| orf19.5730        |           | Unknown                                                                          | 3.2                                  | 4.0  | 1.5         | 1.5   |
| orf19.2172        | ARA1      | D-arabinose 1-dehydrogenase [NAD(P)+] activity                                   | 3.2                                  | 2.7  | 1.1         | 1.1   |
| orf19.6678        |           | Unknown                                                                          | 3.2                                  | 2.9  | 0.6         | 0.6   |
| orf19.6443        |           | dodecenoyl-CoA delta-isomerase activity                                          | 3.1                                  | 2.6  | 1.2         | 0.9   |
| orf19.6049        |           | protein kinase activator activity                                                | 3.1                                  | 3.0  | 1.4         | 0.7   |
| orf19.6690        |           | Unknown                                                                          | 3.1                                  | 3.8  | 1.3         | 1.5   |
| orf19.2248        | ARE2      | sterol O-acyltransferase activity                                                | 3.1                                  | 3.3  | 1.4         | 1.3   |
| orf19.3607        |           | Unknown                                                                          | 3.1                                  | 4.7  | 1.0         | 1.5   |
| orf19.4317        | GRE3      | aldehyde reductase activity, glucose 1-dehydrogenase (NADP+) activity            | 3.1                                  | 4.3  | 1.2         | 2.0   |
| orf19.7448        | LYS9      | saccharopine dehydrogenase (NADP+, L-glutamate-forming) activity                 | 3.1                                  | 3.6  | 1.0         | 1.0   |
| orf19.6805        |           | Unknown                                                                          | 3.1                                  | 4.4  | 1.6         | 2.1   |
| orf19.3633        |           | Unknown                                                                          | 3.1                                  | 5.4  | 0.8         | 1.2   |
| orf19.7596        |           | Unknown                                                                          | 3.1                                  | 2.6  | 0.8         | 0.5   |
| orf19.5248        | MSO1      | Unknown                                                                          | 3.0                                  | 3.1  | 0.8         | 1.0   |
| orf19.277         | TH16      | hydroxyethylthiazole kinase activity, thiamin-phosphate diphosphorylase activity | 3.0                                  | 2.7  | 0.9         | 1.0   |
| orf19.5851        | STE13     | aminopeptidase activity                                                          | 3.0                                  | 5.9  | 1.2         | 1.0   |
| orf19.5718        |           | Unknown                                                                          | 3.0                                  | 5.3  | 1.4         | 2.3   |
| orf19.4894        |           | Unknown                                                                          | 3.0                                  | 4.2  | 1.2         | 1.1   |
| orf19.3372        |           | Unknown                                                                          | 3.0                                  | 3.0  | 1.4         | 1.1   |
| orf19.7434        | GLG2      | glycogenin glucosyltransferase activity                                          | 3.0                                  | 2.7  | 1.0         | 1.0   |
| orf19.147         | YAK1      | protein Kinase activity                                                          | 3.0                                  | 3.6  | 1.4         | 0.9   |
| orf19.1721        | NCE103    | carbonate dehydratase activity                                                   | 3.0                                  | 4.6  | 1.1         | 1.8   |
| orf19.7156        | FAA2-3    | long-chain-fatty-acid-CoA ligase activity                                        | 3.0                                  | 4.5  | 1.2         | 0.8   |
| orf19.5056        |           | enzyme activator activity                                                        | 3.0                                  | 4.3  | 0.9         | 1.3   |
| orf19.5025        | MET3      | sulfate adenyltransferase (ATP) activity                                         | 3.0                                  | 6.5  | 0.6         | 0.8   |
| orf19.851         |           | Unknown                                                                          | 3.0                                  | 3.8  | 1.4         | 1.6   |
| orf19.6850        |           | transcription factor activity, ubiquitin-protein ligase activity                 | 3.0                                  | 3.3  | 1.5         | 1.4   |
| orf19.3007.2      |           | Unknown                                                                          | 3.0                                  | 3.1  | 1.4         | 1.5   |
| orf19.3060        |           | dolichyl-diphosphooligosaccharide-protein glycotransferase activity              | 2.9                                  | 2.9  | 1.1         | 1.3   |
| orf19.7504        |           | Unknown                                                                          | 2.9                                  | 5.7  | 0.9         | 1.7   |
| orf19.5599        | MDL2      | ATP binding, ATPase activity, coupled to transmembrane movement                  | 2.9                                  | 2.6  | 1.2         | 1.1   |
| orf19.1974        | TFS1      | lipid binding, peptidase inhibitor activity                                      | 2.9                                  | 2.9  | 0.8         | 1.0   |
| orf19.6675        |           | Unknown                                                                          | 2.9                                  | 3.7  | 1.4         | 1.1   |
| orf19.6950        |           | Unknown                                                                          | 2.9                                  | 20.4 | 1.3         | 2.5   |
| orf19.6353        |           | Unknown                                                                          | 2.9                                  | 2.4  | 1.2         | 0.9   |
| orf19.5620        |           | Unknown                                                                          | 2.9                                  | 3.5  | 1.2         | 1.3   |
| orf19.4507        |           | Unknown                                                                          | 2.9                                  | 2.9  | 0.9         | 0.7   |
| orf19.2789        |           | Unknown                                                                          | 2.9                                  | 3.4  | 1.4         | 1.3   |
| orf19.4841        | SHY1      | unfolded protein binding                                                         | 2.9                                  | 2.3  | 1.3         | 1.0   |
| orf19.1949        | VPS1      | GTPase activity                                                                  | 2.9                                  | 5.2  | 1.2         | 1.6   |
| orf19.156         | FGR51     | Unknown                                                                          | 2.8                                  | 3.8  | 1.3         | 1.4   |
| orf19.7472        | IFF4      | Unknown                                                                          | 2.8                                  | 13.3 | 0.9         | 0.8   |
| orf19.1608        |           | Unknown                                                                          | 2.8                                  | 6.0  | 0.7         | 0.8   |
| orf19.7567        |           | Unknown                                                                          | 2.8                                  | 6.2  | 1.2         | 1.6   |
| orf19.2613        | ECM4      | glutathione transferase activity                                                 | 2.8                                  | 3.4  | 0.6         | 0.8   |
| orf19.7629        |           | Unknown                                                                          | 2.8                                  | 3.3  | 1.4         | 1.0   |
| orf19.3932        |           | Unknown                                                                          | 2.8                                  | 5.7  | 1.0         | 1.2   |
| orf19.4262        |           | mRNA binding                                                                     | 2.8                                  | 3.3  | 1.0         | 1.0   |
| orf19.7324        | TH13      | Unknown                                                                          | 2.8                                  | 2.4  | 0.8         | 0.8   |
| orf19.3910        |           | Unknown                                                                          | 2.8                                  | 2.9  | 0.6         | 0.5   |
| orf19.5940        | ZCF32     | transcription factor activity                                                    | 2.8                                  | 2.6  | 0.8         | 0.6   |
| orf19.4722        |           | transcription coactivator activity                                               | 2.8                                  | 2.3  | 1.2         | 1.2   |
| orf19.2838        |           | Unknown                                                                          | 2.8                                  | 2.8  | 0.6         | 0.3   |
| orf19.6322        | ARD       | L-arabinitol 2-dehydrogenase activity                                            | 2.8                                  | 4.9  | 1.3         | 2.2   |
| orf19.2031        | VPS24     | protein binding                                                                  | 2.8                                  | 6.9  | 0.8         | 1.2   |
| orf19.1180        |           | 2-aminoacidipate transaminase activity                                           | 2.8                                  | 3.0  | 1.0         | 1.1   |
| orf19.7281        | PDK2      | Unknown                                                                          | 2.8                                  | 2.4  | 0.5         | 0.5   |
| orf19.7078        |           | Unknown                                                                          | 2.7                                  | 3.2  | 0.7         | 0.8   |
| orf19.3901        |           | Unknown                                                                          | 2.7                                  | 3.7  | 1.4         | 1.6   |
| orf19.860         | BMT8      | Unknown                                                                          | 2.7                                  | 3.1  | 0.8         | 0.6   |
| orf19.5843        |           | Unknown                                                                          | 2.7                                  | 3.9  | 0.1         | 1.7   |
| orf19.3293        |           | oxidoreductase activity                                                          | 2.7                                  | 3.1  | 1.4         | 1.0   |
| orf19.4907        |           | Unknown                                                                          | 2.7                                  | 2.6  | 1.0         | 0.9   |
| orf19.1976        |           | Unknown                                                                          | 2.7                                  | 6.3  | 1.3         | 2.1   |
| orf19.6141        | HGT16     | glucose transmembrane transporter activity                                       | 2.7                                  | 2.6  | 0.7         | 0.4   |
| orf19.2768        | AMS1      | alpha-mannosidase activity                                                       | 2.7                                  | 5.1  | 0.6         | 0.8   |
| orf19.6888        |           | Unknown                                                                          | 2.7                                  | 4.9  | 1.1         | 1.5   |
| orf19.3859        |           | ketoreductase activity                                                           | 2.7                                  | 2.3  | 1.3         | 1.0   |
| orf19.6830        |           | Unknown                                                                          | 2.7                                  | 3.6  | 0.8         | 1.3   |
| orf19.5204        |           | Unknown                                                                          | 2.7                                  | 2.6  | 0.9         | 1.1   |
| orf19.91          |           | Unknown                                                                          | 2.6                                  | 4.8  | 1.2         | 1.6   |
| orf19.4903        |           | N-acetylglucosaminylphosphatidylinositol deacetylase activity                    | 2.6                                  | 2.6  | 0.4         | 0.5   |
| orf19.2666        |           | importin-alpha export receptor activity                                          | 2.6                                  | 5.1  | 1.3         | 1.5   |
| orf19.7497        |           | Unknown                                                                          | 2.6                                  | 2.3  | 1.3         | 1.0   |
| orf19.1461        |           | Unknown                                                                          | 2.6                                  | 3.4  | 1.2         | 1.3   |
| orf19.3878        |           | Unknown                                                                          | 2.6                                  | 4.1  | 1.3         | 1.2   |
| orf19.3093        | MSH2      | ATP binding, ATPase activity, DNA binding                                        | 2.6                                  | 3.1  | 0.8         | 0.7   |
| orf19.6296        |           | protein binding                                                                  | 2.6                                  | 3.1  | 0.8         | 1.4   |
| orf19.1019        |           | Unknown                                                                          | 2.6                                  | 4.2  | 1.2         | 1.5   |
| orf19.2030        |           | Unknown                                                                          | 2.6                                  | 5.7  | 1.0         | 1.9   |
| orf19.7060        |           | Unknown                                                                          | 2.6                                  | 3.1  | 1.3         | 1.3   |

| orf19 Designation | Gene Name     | Molecular Function                                                                  | Fold Changes (treated vs. untreated) |      |             |       |
|-------------------|---------------|-------------------------------------------------------------------------------------|--------------------------------------|------|-------------|-------|
|                   |               |                                                                                     | SRR1/SRR1                            |      | Δsrr1/Δsrr1 |       |
|                   |               |                                                                                     | Exp 1                                | Exp2 | Exp 1       | Exp 2 |
| orf19.732         |               | 2,4-dienoyl-CoA reductase (NADPH) activity                                          | 2.6                                  | 5.2  | 0.9         | 1.8   |
| orf19.5295        |               | Unknown                                                                             | 2.5                                  | 3.0  | 0.5         | 0.5   |
| orf19.4883        |               | Unknown                                                                             | 2.5                                  | 4.3  | 0.6         | 0.6   |
| orf19.3201        | <i>MTLA1</i>  | DNA binding, transcription factor activity                                          | 2.5                                  | 3.6  | 1.1         | 1.7   |
| orf19.1760        | <i>RAS1</i>   | GTPase activity, GTP binding                                                        | 2.5                                  | 2.4  | 1.2         | 1.0   |
| orf19.1777        |               | ubiquitin-specific protease activity                                                | 2.5                                  | 2.7  | 1.1         | 0.9   |
| orf19.3846        | <i>LYS4</i>   | homoaconitate hydratase activity                                                    | 2.5                                  | 2.9  | 1.2         | 1.3   |
| orf19.2446        |               | Unknown                                                                             | 2.5                                  | 2.7  | 0.7         | 0.8   |
| orf19.862         |               | Unknown                                                                             | 2.5                                  | 2.1  | 0.7         | 0.9   |
| orf19.4772        | <i>SSU81</i>  | osmosensor activity                                                                 | 2.5                                  | 2.2  | 1.2         | 0.9   |
| orf19.5142        | <i>DFR1</i>   | dihydrofolate reductase activity, drug binding                                      | 2.5                                  | 3.7  | 1.1         | 1.8   |
| orf19.7512        |               | catalytic activity, oxygen binding                                                  | 2.5                                  | 2.8  | 0.9         | 0.6   |
| orf19.3814        |               | Unknown                                                                             | 2.5                                  | 3.2  | 1.0         | 0.9   |
| orf19.2724        |               | Unknown                                                                             | 2.4                                  | 3.7  | 0.9         | 1.7   |
| orf19.5006.1      |               | SNAP receptor activity                                                              | 2.4                                  | 6.7  | 1.2         | 2.2   |
| orf19.816         | <i>DCK2</i>   | Unknown                                                                             | 2.4                                  | 2.9  | 0.9         | 0.9   |
| orf19.1449        |               | Unknown                                                                             | 2.4                                  | 2.1  | 0.7         | 0.6   |
| orf19.4733        | <i>YMC2</i>   | transporter activity                                                                | 2.4                                  | 2.2  | 0.9         | 0.6   |
| orf19.7379        | <i>FAA2</i>   | long-chain-fatty-acid-CoA ligase activity                                           | 2.4                                  | 5.0  | 1.1         | 0.9   |
| orf19.6068        | <i>SVF1</i>   | Unknown                                                                             | 2.4                                  | 2.4  | 0.9         | 0.9   |
| orf19.3865        | <i>RFX1</i>   | sequence-specific DNA binding, transcription activator activity                     | 2.4                                  | 5.0  | 1.2         | 1.3   |
| orf19.3221        |               | contributes to carbamoyl-phosphate synthase (glutamine-hydrolyzing) activity        | 2.4                                  | 2.2  | 0.6         | 0.7   |
| orf19.1765        |               | Unknown                                                                             | 2.4                                  | 2.1  | 0.7         | 0.9   |
| orf19.1933        |               | Unknown                                                                             | 2.4                                  | 2.5  | 1.1         | 0.8   |
| orf19.2846        |               | Unknown                                                                             | 2.4                                  | 2.2  | 0.3         | 0.9   |
| orf19.1037        |               | Unknown                                                                             | 2.4                                  | 3.0  | 0.8         | 0.4   |
| orf19.2451        | <i>PGA45</i>  | Unknown                                                                             | 2.4                                  | 2.8  | 1.1         | 1.3   |
| orf19.4980        | <i>HSP70</i>  | peptide binding, unfolded protein binding                                           | 2.3                                  | 3.7  | 1.1         | 1.5   |
| orf19.5053        |               | acetyltransferase activity, chromatin binding                                       | 2.3                                  | 2.9  | 1.0         | 1.0   |
| orf19.4577        |               | signal transducer activity                                                          | 2.3                                  | 3.5  | 0.9         | 1.1   |
| orf19.6910        | <i>PSF1</i>   | Unknown                                                                             | 2.3                                  | 2.4  | 0.9         | 0.8   |
| orf19.3869        |               | Unknown                                                                             | 2.3                                  | 2.3  | 0.3         | 0.3   |
| orf19.2828        |               | alpha-tubulin binding, chaperone binding, microtubule binding                       | 2.3                                  | 2.3  | 0.6         | 1.0   |
| orf19.317         |               | purine-nucleoside phosphorylase activity                                            | 2.3                                  | 2.3  | 0.8         | 1.0   |
| orf19.4097        |               | Unknown                                                                             | 2.3                                  | 2.4  | 0.8         | 0.8   |
| orf19.4183        | <i>MUC1</i>   | Unknown                                                                             | 2.3                                  | 2.3  | 0.9         | 1.1   |
| orf19.479         |               | Unknown                                                                             | 2.3                                  | 2.1  | 0.9         | 0.9   |
| orf19.7566        |               | amino acid transmembrane transporter activity                                       | 2.3                                  | 3.8  | 1.1         | 1.1   |
| orf19.3226        |               | Unknown                                                                             | 2.3                                  | 2.7  | 0.7         | 0.9   |
| orf19.3405        | <i>ZCF18</i>  | transcription factor activity                                                       | 2.3                                  | 2.7  | 0.9         | 1.3   |
| orf19.2970        | <i>LYS2</i>   | L-aminoadipate-semialdehyde dehydrogenase activity                                  | 2.3                                  | 2.6  | 1.0         | 0.7   |
| orf19.5553        |               | methionine-R-sulfoxide reductase activity                                           | 2.3                                  | 2.3  | 1.0         | 1.2   |
| orf19.5125        |               | Unknown                                                                             | 2.3                                  | 3.8  | 1.0         | 0.7   |
| orf19.5963        |               | Unknown                                                                             | 2.2                                  | 2.3  | 0.9         | 1.0   |
| orf19.3019        |               | enzyme activator activity                                                           | 2.2                                  | 4.6  | 0.9         | 0.9   |
| orf19.192         |               | Unknown                                                                             | 2.2                                  | 2.1  | 0.4         | 0.7   |
| orf19.3879        |               | Unknown                                                                             | 2.2                                  | 2.7  | 0.8         | 0.8   |
| orf19.3612        | <i>PST2</i>   | 2-hydroxy-1,4-benzoquinone reductase activity                                       | 2.2                                  | 2.0  | 0.6         | 0.7   |
| orf19.1307        |               | Unknown                                                                             | 2.2                                  | 2.2  | 0.9         | 0.8   |
| orf19.554         | <i>DIT2</i>   | oxidoreductase activity, oxygen binding                                             | 2.2                                  | 2.9  | 0.8         | 1.1   |
| orf19.2075        | <i>DFG5</i>   | Unknown                                                                             | 2.2                                  | 2.5  | 0.8         | 0.8   |
| orf19.2791        |               | myosin I binding                                                                    | 2.2                                  | 2.6  | 0.9         | 0.9   |
| orf19.6848        | <i>VPS16</i>  | contributes to phosphoinositide binding                                             | 2.2                                  | 2.1  | 0.9         | 0.8   |
| orf19.5194.1      |               | Unknown                                                                             | 2.2                                  | 2.7  | 1.0         | 1.0   |
| orf19.1814        |               | 1-phosphatidylinositol 4-kinase activity                                            | 2.2                                  | 2.0  | 0.9         | 0.9   |
| orf19.1377        | <i>IPK2</i>   | phosphoinositide 3-kinase activity, protein binding                                 | 2.2                                  | 3.3  | 0.8         | 0.8   |
| orf19.1462        | <i>SMP2</i>   | phosphatidate phosphatase activity                                                  | 2.1                                  | 2.2  | 1.0         | 0.9   |
| orf19.3285        |               | Unknown                                                                             | 2.1                                  | 2.0  | 0.7         | 0.9   |
| orf19.4209        |               | ubiquitin activating enzyme activity                                                | 2.1                                  | 2.7  | 1.1         | 1.2   |
| orf19.5797        | <i>PI-PLC</i> | phosphoinositide phospholipase C activity                                           | 2.1                                  | 2.3  | 0.5         | 0.6   |
| orf19.2908        |               | Unknown                                                                             | 2.1                                  | 2.2  | 0.9         | 0.9   |
| orf19.925         |               | Unknown                                                                             | 2.1                                  | 2.1  | 0.9         | 0.8   |
| orf19.4392        | <i>DEM1</i>   | Unknown                                                                             | 2.1                                  | 2.6  | 0.8         | 0.9   |
| orf19.1877        |               | Unknown                                                                             | 2.1                                  | 2.0  | 0.9         | 1.0   |
| orf19.3764        | <i>GSG1</i>   | Unknown                                                                             | 2.1                                  | 2.0  | 0.7         | 1.0   |
| orf19.4415        |               | Unknown                                                                             | 2.1                                  | 3.0  | 0.7         | 1.0   |
| orf19.6525        |               | Unknown                                                                             | 2.1                                  | 2.9  | 1.0         | 1.0   |
| orf19.1444        |               | cytoskeletal adaptor activity                                                       | 2.1                                  | 2.4  | 1.0         | 1.0   |
| orf19.1793        |               | phosphoinositide binding                                                            | 2.1                                  | 4.1  | 1.0         | 2.0   |
| orf19.6024        |               | Unknown                                                                             | 2.1                                  | 3.8  | 0.9         | 1.0   |
| orf19.1586        | <i>FGR22</i>  | phosphoinositide phospholipase C activity                                           | 2.1                                  | 2.4  | 0.6         | 0.6   |
| orf19.5626        |               | Unknown                                                                             | 2.1                                  | 3.0  | 1.0         | 1.0   |
| orf19.3366        | <i>CSH3</i>   | unfolded protein binding                                                            | 2.1                                  | 2.7  | 1.0         | 1.3   |
| orf19.1711        | <i>END3</i>   | cytoskeletal adaptor activity, protein binding                                      | 2.1                                  | 2.4  | 0.5         | 0.7   |
| orf19.3982        |               | maltase activity                                                                    | 2.1                                  | 2.6  | 0.6         | 0.8   |
| orf19.7483        | <i>CRM1</i>   | nuclear export signal receptor activity, protein transmembrane transporter activity | 2.1                                  | 3.0  | 1.0         | 1.0   |
| orf19.3660        |               | Unknown                                                                             | 2.1                                  | 3.1  | 1.0         | 1.1   |
| orf19.5224        |               | protein kinase activity                                                             | 2.1                                  | 3.4  | 0.6         | 0.5   |
| orf19.3986        | <i>PPR1</i>   | transcription factor activity                                                       | 2.1                                  | 12.8 | 1.0         | 1.1   |
| orf19.2910        | <i>PGA43</i>  | Unknown                                                                             | 2.1                                  | 2.5  | 1.0         | 1.0   |
| orf19.4088        |               | hydroxyacylglutathione hydrolase activity                                           | 2.1                                  | 2.3  | 0.8         | 1.0   |
| orf19.4630        | <i>CPA1</i>   | contributes to carbamoyl-phosphate synthase (glutamine-hydrolyzing) activity        | 2.1                                  | 3.7  | 0.6         | 0.8   |
| orf19.1344        |               | Unknown                                                                             | 2.1                                  | 6.7  | 0.5         | 0.7   |
| orf19.5552        |               | Unknown                                                                             | 2.0                                  | 2.3  | 1.0         | 0.6   |
| orf19.5029        | <i>MODF</i>   | ATP binding                                                                         | 2.0                                  | 2.3  | 0.4         | 0.5   |
| orf19.6637        |               | Unknown                                                                             | 2.0                                  | 2.4  | 1.0         | 1.0   |
| orf19.4551        | <i>CTN1</i>   | carnitine O-acetyltransferase activity                                              | 2.0                                  | 4.1  | 0.8         | 0.9   |
| orf19.6877        | <i>PNG2</i>   | Unknown                                                                             | 2.0                                  | 3.6  | 1.0         | 0.9   |
| orf19.1360        |               | Unknown                                                                             | 2.0                                  | 3.8  | 0.5         | 1.0   |
| orf19.5544        | <i>SAC6</i>   | actin filament binding, protein binding                                             | 2.0                                  | 3.2  | 0.9         | 0.9   |
| orf19.537         |               | Unknown                                                                             | 2.0                                  | 4.7  | 0.7         | 1.0   |
| orf19.4416        | <i>VPS13</i>  | Unknown                                                                             | 2.0                                  | 2.1  | 0.9         | 0.9   |
| orf19.7550        | <i>IFA14</i>  | Unknown                                                                             | 2.0                                  | 2.3  | 0.5         | 0.9   |
| orf19.638         | <i>FDH1</i>   | formate dehydrogenase activity                                                      | 2.0                                  | 2.3  | 0.4         | 0.8   |
| orf19.7627        |               | Unknown                                                                             | 2.0                                  | 2.0  | 1.0         | 0.8   |
| orf19.3762        |               | peptide-acetyl-CoA secondary active transmembrane transporter activity              | 2.0                                  | 3.4  | 0.8         | 0.4   |

| orf19 Designation | Gene Name | Molecular Function                         |
|-------------------|-----------|--------------------------------------------|
| orf19.868         | ADAEC     | Unknown                                    |
| orf19.4807        |           | inorganic diphosphatase activity           |
| orf19.4076        | MET10     | sulfite reductase (NADPH) activity         |
| orf19.4015        | CAG1      | GTPase activity, guanyl nucleotide binding |
| orf19.4530.1      |           | Unknown                                    |
| orf19.5423        | EST3      | contributes to telomerase activity         |
| orf19.23          | RTA3      | phospholipid-translocating ATPase activity |
| orf19.2306        |           | oxidoreductase activity                    |
| orf19.1762        | OCA1      | protein tyrosine phosphatase activity      |
| orf19.529         |           | Unknown                                    |
| orf19.4086        |           | Unknown                                    |

| Fold Changes (treated vs. untreated) |      |             |       |
|--------------------------------------|------|-------------|-------|
| SRR1/SRR1                            |      | Δsrr1/Δsrr1 |       |
| Exp 1                                | Exp2 | Exp 1       | Exp 2 |
| 2.0                                  | 2.6  | 0.9         | 0.7   |
| 2.0                                  | 2.8  | 0.7         | 1.0   |
| 2.0                                  | 2.0  | 0.7         | 0.5   |
| 2.0                                  | 2.2  | 0.9         | 0.8   |
| 2.0                                  | 2.1  | 0.8         | 0.7   |
| 2.0                                  | 2.7  | 0.6         | 0.8   |
| 2.0                                  | 3.0  | 0.5         | 0.4   |
| 2.0                                  | 3.4  | 0.4         | 0.5   |
| 2.0                                  | 2.1  | 0.9         | 1.0   |
| 2.0                                  | 2.0  | 0.7         | 0.8   |
| 2.0                                  | 2.2  | 0.9         | 1.1   |
