# Supplementary material
Source: PubMed Central journal article supplement (PMC3675996)
Supplement: EC.00048-13_zek007134114so4.pdf [file EC.00048-13_zek007134114so4.pdf]

Supplementary Table S4. Genes in which expression is increased at least 2-fold from wild-type expression in response to *SRR1* disruption

| orf19 designation | Gene Name     | Molecular function                                                                | Fold Changes ( <i>SRR1</i> vs. $\Delta$ <i>srr1</i> ) |       |
|-------------------|---------------|-----------------------------------------------------------------------------------|-------------------------------------------------------|-------|
|                   |               |                                                                                   | Exp 1                                                 | Exp 2 |
| orf19.5113        | <i>ADH2</i>   | alcohol dehydrogenase (NAD) activity                                              | 3.2                                                   | 2.0   |
| orf19.4679        | <i>AGP2</i>   | amino acid transmembrane transporter activity                                     | 2.5                                                   | 2.3   |
| orf19.6306        |               | aldehyde dehydrogenase (NAD) activity                                             | 2.4                                                   | 2.3   |
| orf19.7513        |               | catalytic activity                                                                | 5.1                                                   | 4.4   |
| orf19.7512        |               | catalytic activity                                                                | 2.3                                                   | 2.9   |
| orf19.5741        | <i>ALS1</i>   | protein binding, cell adhesion molecule binding                                   | 3.2                                                   | 13.0  |
| orf19.7414        | <i>ALS6</i>   | cell adhesion molecule binding                                                    | 2.2                                                   | 2.4   |
| orf19.2768        | <i>AMS1</i>   | alpha-mannosidase activity                                                        | 4.7                                                   | 5.1   |
| orf19.4899        | <i>GCA1</i>   | amylase activity                                                                  | 2.3                                                   | 3.3   |
| orf19.4774        | <i>AOX1</i>   | alternative oxidase activity (IMP, ISS)                                           | 3.1                                                   | 2.8   |
| orf19.6322        | <i>ARD</i>    | L-arabinitol 2-dehydrogenase activity                                             | 2.4                                                   | 2.3   |
| orf19.7469        | <i>ARG1</i>   | argininosuccinate synthase activity                                               | 3.0                                                   | 3.4   |
| orf19.3771        | <i>ARG8</i>   | N2-acetyl-L-ornithine:2-oxoglutarate 5-aminotransferase activity                  | 3.1                                                   | 3.0   |
| orf19.3122        | <i>ARR3</i>   | arsenite transmembrane transporter activity                                       | 2.0                                                   | 3.0   |
| orf19.1077        | <i>ATM1</i>   | ATP binding, ATPase activity                                                      | 3.9                                                   | 2.4   |
| orf19.1945        | <i>AUR1</i>   | inositol phosphoceramide synthase activity                                        | 2.6                                                   | 5.0   |
| orf19.797         | <i>BAT21</i>  | branched-chain-amino-acid transaminase activity                                   | 2.4                                                   | 2.8   |
| orf19.2590        |               | dethiobiotin synthase activity                                                    | 7.8                                                   | 2.1   |
| orf19.6674        | <i>BTS1</i>   | farnesyltranstransferase activity                                                 | 2.3                                                   | 2.1   |
| orf19.3298        | <i>CCH1</i>   | calcium channel activity                                                          | 2.1                                                   | 2.4   |
| orf19.3545        |               | protein kinase activity                                                           | 4.1                                                   | 6.0   |
| orf19.1279        | <i>CDS1</i>   | phosphatidate cytidyltransferase activity                                         | 2.3                                                   | 2.2   |
| orf19.677         | <i>CHO1</i>   | CDP-diacylglycerol-serine O-phosphatidyltransferase activity                      | 2.3                                                   | 2.2   |
| orf19.1960        | <i>CLN3</i>   | cyclin-dependent protein kinase regulator activity                                | 2.6                                                   | 5.7   |
| orf19.4235        | <i>PDE1</i>   | 3',5'-cyclic-AMP phosphodiesterase activity                                       | 3.1                                                   | 4.7   |
| orf19.4630        | <i>CPA1</i>   | contributes to carbamoyl-phosphate synthase (glutamine-hydrolyzing) activity      | 2.2                                                   | 3.0   |
| orf19.4610        |               | Unknown                                                                           | 2.1                                                   | 3.4   |
| orf19.2706        | <i>CRH11</i>  | Unknown                                                                           | 2.1                                                   | 2.1   |
| orf19.6534.2      |               | actin filament binding, microtubule binding                                       | 2.0                                                   | 4.4   |
| orf19.7680        | <i>CTA26</i>  | transcription activator activity                                                  | 2.4                                                   | 3.4   |
| orf19.3682        | <i>CWH8</i>   | pyrophosphatase activity, dolichylidiphosphatase activity                         | 2.5                                                   | 3.2   |
| orf19.3127        | <i>CZF1</i>   | DNA binding, transcription factor activity                                        | 2.4                                                   | 2.9   |
| orf19.4082        | <i>DDR48</i>  | Unknown                                                                           | 5.6                                                   | 20.8  |
| orf19.2075        | <i>DFG5</i>   | Unknown                                                                           | 2.7                                                   | 2.7   |
| orf19.5142        | <i>DFR1</i>   | dihydrofolate reductase activity                                                  | 3.4                                                   | 2.7   |
| orf19.2943        |               | amino acid transmembrane transporter activity                                     | 2.7                                                   | 2.4   |
| orf19.6043        |               | D-lactate dehydrogenase (cytochrome) activity                                     | 2.6                                                   | 2.5   |
| orf19.6755        |               | D-lactate dehydrogenase (cytochrome) activity                                     | 2.0                                                   | 2.9   |
| orf19.7207        | <i>DOA4</i>   | endopeptidase activity, ubiquitin thiolesterase activity                          | 2.0                                                   | 2.5   |
| orf19.5417        | <i>DOT5</i>   | thioredoxin peroxidase activity                                                   | 2.2                                                   | 3.0   |
| orf19.6459        | <i>DPP3</i>   | phosphatase activity                                                              | 3.9                                                   | 2.0   |
| orf19.2680        |               | phospholipid-translocating ATPase activity                                        | 2.3                                                   | 3.4   |
| orf19.5677        | <i>DUR4</i>   | urea transmembrane transporter activity                                           | 2.3                                                   | 3.9   |
| orf19.3234        |               | NADPH dehydrogenase activity                                                      | 2.2                                                   | 2.3   |
| orf19.4887        | <i>ECM21</i>  | ubiquitin protein ligase binding                                                  | 3.5                                                   | 3.6   |
| orf19.2623        |               | transcription factor activity, RNA polymerase II transcription factor activity    | 4.2                                                   | 3.9   |
| orf19.4255        | <i>ECM331</i> | Unknown                                                                           | 5.2                                                   | 6.6   |
| orf19.6070        | <i>ENA2</i>   | potassium-transporting ATPase activity, sodium-exporting ATPase activity          | 2.2                                                   | 2.6   |
| orf19.6023        |               | Unknown                                                                           | 2.7                                                   | 3.3   |
| orf19.2073        |               | Unknown                                                                           | 2.1                                                   | 2.4   |
| orf19.460         | <i>CEK2</i>   | MAP kinase activity                                                               | 2.2                                                   | 3.3   |
| orf19.5416        |               | H4/H2 histone acetyltransferase activity                                          | 2.3                                                   | 2.2   |
| orf19.2952        | <i>EXG2</i>   | glucan 1,3-beta-glucosidase activity                                              | 3.7                                                   | 3.1   |
| orf19.4114        | <i>FAA2-1</i> | long-chain-fatty-acid-CoA ligase activity                                         | 3.2                                                   | 3.5   |
| orf19.5951        |               | fatty-acid synthase activity, 3-oxoacyl-[acyl-carrier-protein] reductase activity | 3.2                                                   | 3.0   |
| orf19.638         | <i>FDH1</i>   | formate dehydrogenase activity                                                    | 7.2                                                   | 2.8   |
| orf19.1117        |               | formate dehydrogenase activity                                                    | 2.8                                                   | 2.0   |
| orf19.943         | <i>FET33</i>  | ferroxidase activity                                                              | 2.0                                                   | 2.6   |
| orf19.4589        |               | amine oxidase activity                                                            | 3.8                                                   | 3.7   |
| orf19.5634        | <i>FRP1</i>   | ferric-chelate reductase activity                                                 | 2.0                                                   | 2.5   |
| orf19.6997        |               | Unknown                                                                           | 2.4                                                   | 2.5   |
| orf19.3441        | <i>FRP6</i>   | Unknown                                                                           | 3.0                                                   | 2.2   |
| orf19.4802        | <i>FTH1</i>   | Unknown                                                                           | 2.3                                                   | 2.0   |
| orf19.6724.1      | <i>FUM12</i>  | fumarate hydratase activity                                                       | 2.1                                                   | 2.1   |
| orf19.7053        | <i>GAC1</i>   | protein phosphatase type 1 regulator activity                                     | 5.4                                                   | 5.7   |
| orf19.3672        | <i>GAL10</i>  | UDP-glucose 4-epimerase activity, aldose 1-epimerase activity                     | 2.0                                                   | 2.4   |
| orf19.3670        | <i>GAL1</i>   | galactokinase activity, transcription activator activity                          | 2.1                                                   | 2.2   |
| orf19.6659        | <i>GAP6</i>   | Unknown                                                                           | 2.4                                                   | 5.5   |
| orf19.2192        | <i>GDH2</i>   | glutamate dehydrogenase activity                                                  | 2.0                                                   | 3.9   |
| orf19.5622        | <i>GLC3</i>   | 1,4-alpha-glucan branching enzyme activity                                        | 2.0                                                   | 2.4   |
| orf19.6285        | <i>GLC7</i>   | protein serine/threonine phosphatase activity                                     | 2.0                                                   | 2.6   |
| orf19.7434        | <i>GLG2</i>   | glycogenin glucosyltransferase activity                                           | 3.5                                                   | 12.6  |
| orf19.7566        |               | amino acid transmembrane transporter activity                                     | 2.6                                                   | 2.4   |
| orf19.691         | <i>GPD2</i>   | glycerol-3-phosphate dehydrogenase (NAD+) activity                                | 2.4                                                   | 3.5   |
| orf19.87          | <i>GPX1</i>   | glutathione peroxidase activity                                                   | 9.0                                                   | 2.7   |
| orf19.3150        | <i>GRE2</i>   | oxidoreductase activity                                                           | 5.5                                                   | 4.9   |
| orf19.2929        | <i>GSC1</i>   | 1,3-beta-glucan synthase activity                                                 | 2.2                                                   | 2.5   |
| orf19.6706        | <i>GYP7</i>   | Rab GTPase activator activity                                                     | 3.8                                                   | 2.2   |
| orf19.4527        | <i>HGT1</i>   | glucose transmembrane transporter activity                                        | 3.4                                                   | 7.2   |
| orf19.3668        | <i>HGT2</i>   | glucose transmembrane transporter activity                                        | 2.0                                                   | 2.5   |
| orf19.183         | <i>HIS3</i>   | imidazoleglycerol-phosphate dehydratase activity                                  | 2.1                                                   | 2.2   |
| orf19.896         | <i>CHK1</i>   | two-component sensor activity, osmosensor activity                                | 3.1                                                   | 2.6   |
| orf19.2517        |               | drug transporter activity                                                         | 4.9                                                   | 2.4   |
| orf19.719         |               | ubiquitin-protein ligase activity                                                 | 2.3                                                   | 2.2   |
| orf19.4526        | <i>HSP30</i>  | Unknown                                                                           | 2.5                                                   | 6.1   |
| orf19.2021        | <i>HGT8</i>   | glucose transmembrane transporter activity                                        | 3.7                                                   | 4.4   |
| orf19.2022        |               | glucose transmembrane transporter activity                                        | 5.9                                                   | 7.1   |
| orf19.156         | <i>FGR51</i>  | Unknown                                                                           | 2.1                                                   | 3.1   |
| orf19.5619        |               | Unknown                                                                           | 2.3                                                   | 2.4   |
| orf19.7550        | <i>IFA14</i>  | Unknown                                                                           | 8.1                                                   | 6.1   |
| orf19.996         |               | adenylate cyclase activity                                                        | 4.5                                                   | 6.0   |
| orf19.4507        |               | Unknown                                                                           | 2.3                                                   | 2.4   |
| orf19.3919        |               | cysteine-type endopeptidase activity                                              | 2.2                                                   | 3.1   |
| orf19.6353        |               | Unknown                                                                           | 2.0                                                   | 2.7   |
| orf19.1326        |               | Unknown                                                                           | 2.2                                                   | 3.1   |
| orf19.6690        |               | Unknown                                                                           | 2.3                                                   | 2.7   |

## Fold Changes (SRR1 vs. Δsrr1)

| orf19 designation | Gene Name | Molecular function                                                                   | Δsrr1/Δsrr1 |       |
|-------------------|-----------|--------------------------------------------------------------------------------------|-------------|-------|
|                   |           |                                                                                      | Exp 1       | Exp 2 |
| orf19.3749        | IFC3      | oligopeptide transporter activity                                                    | 3.0         | 2.2   |
| orf19.4477        | CSH1      | oxidoreductase activity, aryl-alcohol dehydrogenase activity                         | 8.3         | 12.4  |
| orf19.4476        |           | aryl-alcohol dehydrogenase activity                                                  | 30.9        | 92.9  |
| orf19.629         | IFD7      | Unknown                                                                              | 2.8         | 3.8   |
| orf19.7472        | IFF4      | Unknown                                                                              | 3.0         | 3.2   |
| orf19.4072        | IFF6      | Unknown                                                                              | 2.7         | 3.7   |
| orf19.6678        |           | Unknown                                                                              | 3.8         | 2.4   |
| orf19.2176        | IFM3      | Unknown                                                                              | 3.0         | 3.4   |
| orf19.6037        | ASM3      | sphingomyelin phosphodiesterase activity                                             | 2.3         | 2.4   |
| orf19.2462        | PRN3      | Unknown                                                                              | 3.1         | 2.1   |
| orf19.7229        |           | Unknown                                                                              | 2.7         | 2.3   |
| orf19.7585        | INO1      | inositol-3-phosphate synthase activity                                               | 5.2         | 7.8   |
| orf19.6126        | KGD2      | dihydropyrimidinase activity                                                         | 2.4         | 2.7   |
| orf19.4377        | KRE1      | Unknown                                                                              | 2.4         | 2.0   |
| orf19.4432        |           | protein serine/threonine kinase activity                                             | 2.3         | 3.1   |
| orf19.5566        |           | Unknown                                                                              | 2.7         | 2.9   |
| orf19.3249        | LAG1      | protein transporter activity                                                         | 5.4         | 4.7   |
| orf19.1375        | LEU42     | 2-isopropylmalate synthase activity                                                  | 2.7         | 4.8   |
| orf19.7320        | LIP7      | lipase activity                                                                      | 10.6        | 3.5   |
| orf19.1789.1      | LYS1      | saccharopine dehydrogenase (NAD+, L-lysine-forming) activity                         | 2.5         | 3.0   |
| orf19.3981        | MAL31     | sugar transmembrane transporter activity                                             | 2.2         | 3.1   |
| orf19.5599        | MDL2      | ATP binding, ATPase activity                                                         | 2.0         | 2.6   |
| orf19.2690        |           | GTPase activity                                                                      | 2.4         | 2.1   |
| orf19.3212        | MID1      | calcium channel activity                                                             | 2.1         | 2.1   |
| orf19.1010        | MNT3      | alpha-1,2-mannosyltransferase activity                                               | 3.9         | 2.6   |
| orf19.479         |           | Unknown                                                                              | 2.0         | 2.0   |
| orf19.1149        | MRF1      | DNA binding                                                                          | 3.6         | 3.9   |
| orf19.4478        |           | aspartate-tRNA ligase activity                                                       | 2.1         | 2.7   |
| orf19.2665        | MSN5      | importin-alpha export receptor activity                                              | 2.0         | 2.4   |
| orf19.2666        |           | importin-alpha export receptor activity                                              | 3.1         | 6.2   |
| orf19.2028        | MXR1      | peptide-methionine-(S)-S-oxide reductase activity                                    | 3.0         | 3.5   |
| orf19.2156        | NAG1      | glucosamine-6-phosphate deaminase activity                                           | 2.7         | 2.0   |
| orf19.2157        | DAC1      | N-acetylglucosamine-6-phosphate deacetylase activity                                 | 2.1         | 2.3   |
| orf19.7242        | NCR1      | sphingolipid transporter activity                                                    | 2.5         | 2.5   |
| orf19.339         | NDE1      | transcription factor activity, NADH dehydrogenase activity                           | 2.4         | 3.0   |
| orf19.4657        |           | contributes to phosphoprotein phosphatase activity                                   | 2.9         | 2.3   |
| orf19.7150        | NRG1      | double-stranded DNA binding, transcription factor activity                           | 2.0         | 2.0   |
| orf19.6857        |           | RNA binding, structural molecule activity                                            | 2.1         | 2.2   |
| orf19.2769        |           | endopeptidase inhibitor activity                                                     | 2.6         | 2.3   |
| orf19.7514        | PCK1      | phosphoenolpyruvate carboxykinase (ATP) activity                                     | 2.9         | 3.7   |
| orf19.5662        | PEP7      | phosphatidylinositol 3-phosphate binding                                             | 2.6         | 3.0   |
| orf19.3605        |           | Unknown                                                                              | 4.4         | 2.4   |
| orf19.4041        |           | ubiquitin-protein ligase activity                                                    | 3.2         | 2.8   |
| orf19.2619        | PHO113    | acid phosphatase activity                                                            | 2.7         | 2.1   |
| orf19.5224        |           | protein kinase activity                                                              | 2.2         | 3.4   |
| orf19.6594        | PLB3      | lysophospholipase activity                                                           | 3.3         | 2.8   |
| orf19.1727        | PMC1      | calcium-transporting ATPase activity                                                 | 2.2         | 2.2   |
| orf19.2242        | PRB1      | serine-type endopeptidase activity                                                   | 2.0         | 2.1   |
| orf19.4135        | PRC2      | Unknown                                                                              | 3.1         | 2.8   |
| orf19.4263        |           | Unknown                                                                              | 4.1         | 13.7  |
| orf19.4262        |           | mRNA binding                                                                         | 3.9         | 6.2   |
| orf19.7500        | PXA1      | ATP binding, ATPase activity                                                         | 2.5         | 2.5   |
| orf19.4681        | RAT1      | 5'-3' exonuclease activity, microtubule binding, recombinase activity                | 2.2         | 2.6   |
| orf19.7247        | RIM101    | DNA binding, transcription factor activity                                           | 2.4         | 2.3   |
| orf19.1069        | RPN4      | sequence-specific DNA binding, transcription factor activity, endopeptidase activity | 3.0         | 5.2   |
| orf19.4032        | RPN5      | endopeptidase activity                                                               | 2.1         | 2.8   |
| orf19.24          | RTA2      | phospholipid-translocating ATPase activity                                           | 2.4         | 2.1   |
| orf19.23          | RTA3      | phospholipid-translocating ATPase activity                                           | 6.0         | 8.6   |
| orf19.6595        | RTA4      | phospholipid-translocating ATPase activity                                           | 11.5        | 17.2  |
| orf19.6928        | SAP9      | aspartic-type endopeptidase activity, structural constituent of cell wall            | 2.0         | 3.3   |
| orf19.5118        | SDS24     | Unknown                                                                              | 2.9         | 2.3   |
| orf19.4993        | SEC18     | ATP binding, ATPase activity                                                         | 2.4         | 3.9   |
| orf19.2270        | SMF12     | manganese ion transmembrane transporter activity                                     | 2.2         | 2.3   |
| orf19.5006.1      |           | SNAP receptor activity                                                               | 2.0         | 2.5   |
| orf19.2812        |           | Unknown                                                                              | 10.5        | 3.6   |
| orf19.1161        | PLD1      | phospholipase D activity, phosphatidylinositol 3-phosphate binding                   | 2.3         | 23.8  |
| orf19.2361        |           | histone acetyltransferase activity, sequence-specific DNA binding                    | 2.7         | 2.7   |
| orf19.5031        | SSK1      | signal transducer activity, two-component response regulator activity                | 3.0         | 3.0   |
| orf19.7313        | SSU1      | sulfite transmembrane transporter activity                                           | 2.4         | 3.3   |
| orf19.4772        | SSU81     | osmosensor activity                                                                  | 2.1         | 2.1   |
| orf19.3519        | SUA72     | general RNA polymerase II transcription factor activity                              | 2.4         | 4.8   |
| orf19.5735.3      |           | Unknown                                                                              | 4.3         | 2.8   |
| orf19.1777        |           | ubiquitin-specific protease activity                                                 | 2.0         | 2.1   |
| orf19.803         |           | 4-aminobutyrate transaminase activity                                                | 2.6         | 6.1   |
| orf19.345         |           | succinate-semialdehyde dehydrogenase [NAD(P)+] activity                              | 2.3         | 4.6   |
| orf19.7393        |           | NAD+ kinase activity (IEA)  NADH kinase activity                                     | 3.3         | 3.6   |
| orf19.1671        | UTR2      | Unknown                                                                              | 2.0         | 2.3   |
| orf19.129         |           | protein serine/threonine kinase activity                                             | 2.1         | 7.1   |
| orf19.5543        |           | protein binding                                                                      | 2.3         | 2.7   |
| orf19.5543        |           | protein binding                                                                      | 2.3         | 2.6   |
| orf19.2031        | VPS24     | protein binding                                                                      | 2.6         | 3.0   |
| orf19.147         | YAK1      | protein kinase activity                                                              | 2.5         | 3.6   |
| orf19.148         |           | protein kinase activity                                                              | 2.2         | 3.2   |
| orf19.3104        | YDC1      | ceramidase activity                                                                  | 2.1         | 2.3   |
| orf19.7637        | YHB4      | nitric oxide dioxygenase activity                                                    | 2.1         | 2.1   |
| orf19.1252        | YME1      | ATP-dependent peptidase activity                                                     | 2.0         | 2.7   |
| orf19.2057        |           | ATPase activity, metallopeptidase activity                                           | 2.0         | 2.7   |
| orf19.5940        | ZCF32     | transcription factor activity                                                        | 2.6         | 3.3   |
| orf19.6196        |           | Unknown                                                                              | 2.1         | 18.0  |
| orf19.467         |           | Unknown                                                                              | 3.0         | 2.9   |
| orf19.2726        |           | Unknown                                                                              | 3.4         | 2.2   |
| orf19.4577        |           | signal transducer activity                                                           | 2.4         | 2.0   |
| orf19.2274        |           | Unknown                                                                              | 2.3         | 5.9   |
| orf19.2113        |           | Unknown                                                                              | 2.1         | 2.4   |
| orf19.3369        | MOH1      | Unknown                                                                              | 5.3         | 20.8  |
| orf19.2887        | MET13     | Unknown                                                                              | 2.6         | 2.2   |

Fold Changes (*SRR1* vs. *Δsrr1*)

| orf19 designation | Gene Name    | Molecular function                                                | <i>Δsrr1</i> / <i>Δsrr1</i> |       |
|-------------------|--------------|-------------------------------------------------------------------|-----------------------------|-------|
|                   |              |                                                                   | Exp 1                       | Exp 2 |
| orf19.103         | <i>KAR5</i>  | Unknown                                                           | 5.3                         | 17.9  |
| orf19.419         |              | Unknown                                                           | 3.4                         | 5.9   |
| orf19.246         |              | Unknown                                                           | 4.5                         | 4.9   |
| orf19.1255        | <i>ZCF5</i>  | transcription factor activity                                     | 2.1                         | 2.1   |
| orf19.3302        |              | Unknown                                                           | 2.6                         | 2.8   |
| orf19.1751        | <i>SPT23</i> | DNA binding, transcription activator activity                     | 2.9                         | 3.0   |
| orf19.5730        |              | Unknown                                                           | 2.7                         | 3.2   |
| orf19.2356        | <i>CRZ2</i>  | transcription factor activity                                     | 2.0                         | 2.6   |
| orf19.782         |              | Unknown                                                           | 2.4                         | 2.7   |
| orf19.3923        | <i>PGA37</i> | Unknown                                                           | 6.1                         | 2.7   |
| orf19.3926        |              | endoribonuclease activity                                         | 2.0                         | 20.2  |
| orf19.1422        | <i>FZO1</i>  | GTPase activity                                                   | 2.0                         | 2.0   |
| orf19.5428        |              | manganese ion transmembrane transporter activity                  | 2.8                         | 2.5   |
| orf19.1944        | <i>GPR1</i>  | G-protein coupled receptor activity                               | 2.7                         | 2.7   |
| orf19.5431        |              | Unknown                                                           | 4.2                         | 3.3   |
| orf19.5669        |              | Unknown                                                           | 2.0                         | 2.1   |
| orf19.633         |              | Unknown                                                           | 2.8                         | 2.5   |
| orf19.3854        |              | protein kinase activity                                           | 2.7                         | 3.0   |
| orf19.2552        |              | calcium-transporting ATPase activity                              | 2.2                         | 2.1   |
| orf19.2154        | <i>HXK1</i>  | N-acetylglucosamine kinase activity, hexokinase activity          | 2.5                         | 2.2   |
| orf19.2791        |              | myosin I binding                                                  | 2.1                         | 2.3   |
| orf19.1277        |              | Unknown                                                           | 2.8                         | 4.3   |
| orf19.5295        |              | Unknown                                                           | 4.3                         | 4.4   |
| orf19.4183        | <i>MUC1</i>  | Unknown                                                           | 2.2                         | 2.6   |
| orf19.2079        | <i>PHHB</i>  | Unknown                                                           | 2.5                         | 2.1   |
| orf19.3412        | <i>ATG15</i> | Unknown                                                           | 2.1                         | 2.0   |
| orf19.5635        | <i>PGA7</i>  | Unknown                                                           | 2.1                         | 2.2   |
| orf19.376         |              | Unknown                                                           | 2.4                         | 5.2   |
| orf19.1950        |              | phosphatase activity                                              | 2.8                         | 2.0   |
| orf19.2064        |              | transcription factor activity                                     | 2.3                         | 2.9   |
| orf19.2670        |              | 3-hydroxyacyl-[acyl-carrier-protein] dehydratase activity         | 2.2                         | 2.1   |
| orf19.698         |              | Unknown                                                           | 2.4                         | 2.6   |
| orf19.4655        | <i>OPT6</i>  | oligopeptide transporter activity                                 | 3.4                         | 2.0   |
| orf19.5069        |              | Unknown                                                           | 2.2                         | 2.3   |
| orf19.216         |              | Unknown                                                           | 2.2                         | 2.4   |
| orf19.5605        |              | ubiquitin protein ligase binding                                  | 2.2                         | 2.2   |
| orf19.5552        |              | Unknown                                                           | 2.9                         | 2.6   |
| orf19.334         |              | Unknown                                                           | 2.0                         | 2.1   |
| orf19.2515        |              | Unknown                                                           | 4.9                         | 5.2   |
| orf19.4780        |              | drug transporter activity                                         | 2.5                         | 3.2   |
| orf19.2244        |              | Unknown                                                           | 3.0                         | 3.1   |
| orf19.7381        | <i>ZCF37</i> | transcription factor activity                                     | 2.8                         | 2.5   |
| orf19.5094        | <i>BUL1</i>  | Unknown                                                           | 3.9                         | 4.9   |
| orf19.1785        |              | Unknown                                                           | 2.5                         | 2.4   |
| orf19.5610        | <i>ARG3</i>  | ornithine carbamoyltransferase activity                           | 3.0                         | 2.1   |
| orf19.215         |              | Unknown                                                           | 2.6                         | 2.2   |
| orf19.3874        |              | Unknown                                                           | 2.0                         | 2.0   |
| orf19.3877        |              | Unknown                                                           | 2.4                         | 3.6   |
| orf19.6416        |              | Unknown                                                           | 2.2                         | 2.3   |
| orf19.740         | <i>HAP41</i> | transcription activator activity                                  | 3.5                         | 3.2   |
| orf19.35          |              | Unknown                                                           | 3.3                         | 2.4   |
| orf19.6420        | <i>PGA13</i> | Unknown                                                           | 2.7                         | 18.4  |
| orf19.6211        |              | enzyme regulator activity                                         | 3.0                         | 2.3   |
| orf19.5925        |              | Unknown                                                           | 2.0                         | 2.5   |
| orf19.2344        | <i>ASR1</i>  | Unknown                                                           | 2.2                         | 2.7   |
| orf19.2346        |              | Unknown                                                           | 3.1                         | 3.8   |
| orf19.5159        |              | amidophosphoribosyltransferase activity, omega peptidase activity | 2.7                         | 2.2   |
| orf19.5205        |              | Unknown                                                           | 2.1                         | 2.9   |
| orf19.5204        |              | Unknown                                                           | 2.8                         | 2.8   |
| orf19.6068        | <i>SVF1</i>  | Unknown                                                           | 3.2                         | 3.5   |
| orf19.6254        | <i>ANT1</i>  | adenine nucleotide transmembrane transporter activity             | 2.5                         | 2.7   |
| orf19.2451        | <i>PGA45</i> | Unknown                                                           | 2.6                         | 3.3   |
| orf19.164         |              | lipase activity                                                   | 2.9                         | 3.3   |
| orf19.4688        | <i>DAG7</i>  | response to drug                                                  | 3.1                         | 2.8   |
| orf19.1675        |              | Unknown                                                           | 2.0                         | 2.2   |
| orf19.3799        |              | Unknown                                                           | 2.0                         | 2.3   |
| orf19.4347        |              | receptor signaling protein serine/threonine kinase activity       | 2.4                         | 2.0   |
| orf19.2398        |              | Unknown                                                           | 3.9                         | 2.1   |
| orf19.6049        |              | protein kinase activator activity                                 | 2.0                         | 2.5   |
| orf19.6048        |              | dolichyl-phosphate-mannose-protein mannosyltransferase activity   | 2.4                         | 2.2   |
| orf19.4474        |              | Unknown                                                           | 3.4                         | 2.3   |
| orf19.4758        |              | Unknown                                                           | 2.0                         | 2.0   |
| orf19.1826        | <i>MDM34</i> | transcription factor activity                                     | 2.5                         | 2.1   |
| orf19.4699        |              | phospholipase activity, triglyceride lipase activity              | 2.6                         | 2.1   |
| orf19.1317        | <i>OSH3</i>  | steroid binding, oxysterol binding                                | 2.1                         | 2.2   |
| orf19.4316        |              | trimethyllysine dioxygenase activity                              | 2.1                         | 2.3   |
| orf19.7359        | <i>CRZ1</i>  | transcription factor activity                                     | 3.1                         | 2.6   |
| orf19.192         |              | Unknown                                                           | 5.0                         | 2.4   |
| orf19.5125        |              | Unknown                                                           | 3.0                         | 3.5   |
| orf19.3588        |              | Unknown                                                           | 2.9                         | 2.0   |
| orf19.4131        |              | Unknown                                                           | 2.0                         | 2.2   |
| orf19.2832        | <i>INN1</i>  | Unknown                                                           | 4.2                         | 3.0   |
| orf19.351         |              | Unknown                                                           | 2.1                         | 2.2   |
| orf19.2414        |              | Unknown                                                           | 2.7                         | 4.7   |
| orf19.5626        |              | Unknown                                                           | 3.0                         | 2.5   |
| orf19.347         | <i>RSN1</i>  | Unknown                                                           | 3.3                         | 2.1   |
| orf19.5867        | <i>WSC1</i>  | Unknown                                                           | 5.1                         | 3.5   |
| orf19.3051        |              | Unknown                                                           | 2.0                         | 2.2   |
| orf19.4970        |              | Unknown                                                           | 2.5                         | 13.1  |
| orf19.1911        | <i>PGA52</i> | Unknown                                                           | 3.3                         | 2.6   |
| orf19.2432        | <i>HAC1</i>  | transcription factor activity                                     | 3.3                         | 2.1   |
| orf19.551         |              | tRNA methyltransferase activity                                   | 4.3                         | 3.8   |
| orf19.2607        |              | Unknown                                                           | 3.1                         | 2.1   |
| orf19.5045        |              | protein tyrosine phosphatase activity                             | 4.7                         | 2.2   |
| orf19.4961        | <i>STP2</i>  | specific RNA polymerase II transcription factor activity          | 2.1                         | 2.2   |
| orf19.207         | <i>PGA55</i> | Unknown                                                           | 2.0                         | 3.5   |

Fold Changes (SRR1 vs. Δsrr1)

| orf19 designation | Gene Name | Molecular function                               | Δsrr1/Δsrr1 |       |
|-------------------|-----------|--------------------------------------------------|-------------|-------|
|                   |           |                                                  | Exp 1       | Exp 2 |
| orf19.173         |           | transcription factor activity                    | 2.9         | 2.9   |
| orf19.3922        |           | nucleotidase activity                            | 2.0         | 2.1   |
| orf19.3932        |           | Unknown                                          | 2.4         | 2.9   |
| orf19.6578        |           | neurotransmitter transporter activity            | 2.6         | 3.9   |
| orf19.4795        |           | Unknown                                          | 2.2         | 2.4   |
| orf19.2458        |           | transcription factor activity                    | 4.0         | 6.1   |
| orf19.6464        |           | Unknown                                          | 2.2         | 3.1   |
| orf19.5037        |           | Unknown                                          | 2.4         | 3.0   |
| orf19.4907        |           | Unknown                                          | 2.6         | 2.6   |
| orf19.5754        |           | Unknown                                          | 2.8         | 2.5   |
| orf19.4358        |           | Unknown                                          | 2.4         | 2.0   |
| orf19.6078        | PQL93     | Unknown                                          | 2.0         | 3.7   |
| orf19.4991        | MPT5      | mRNA binding                                     | 2.1         | 3.0   |
| orf19.796         | HYM1      | Unknown                                          | 2.3         | 2.3   |
| orf19.5876        |           | Unknown                                          | 2.5         | 2.9   |
| orf19.5877        | ATF1      | alcohol O-acetyltransferase activity             | 2.5         | 2.2   |
| orf19.5879        |           | acylglycerone-phosphate reductase activity       | 2.6         | 3.3   |
| orf19.5620        |           | Unknown                                          | 2.8         | 3.0   |
| orf19.4415        |           | Unknown                                          | 2.4         | 2.2   |
| orf19.761         | TCO89     | Unknown                                          | 2.0         | 2.7   |
| orf19.5207        |           | Unknown                                          | 2.3         | 3.0   |
| orf19.1733        | UTP20     | Unknown                                          | 10.6        | 20.4  |
| orf19.5902        | RAS2      | GTPase activity                                  | 2.8         | 6.1   |
| orf19.711         |           | Unknown                                          | 2.7         | 2.8   |
| orf19.5903        | RAX1      | Unknown                                          | 2.0         | 2.9   |
| orf19.7131        |           | gamma-butyrobetaine dioxygenase activity         | 2.1         | 2.2   |
| orf19.1813        | FLC2      | FAD transmembrane transporter activity           | 2.9         | 2.1   |
| orf19.1433        |           | Unknown                                          | 2.1         | 2.6   |
| orf19.7148        | TPO2      | drug transporter activity                        | 2.8         | 2.7   |
| orf19.916         |           | Unknown                                          | 3.4         | 2.7   |
| orf19.3233        |           | protein binding                                  | 2.1         | 3.1   |
| orf19.7158        |           | anion:cation symporter activity                  | 2.5         | 2.4   |
| orf19.1350        |           | Unknown                                          | 3.0         | 33.0  |
| orf19.94          |           | Unknown                                          | 5.5         | 2.4   |
| orf19.6877        | PNG2      | Unknown                                          | 2.8         | 3.9   |
| orf19.4869        | SFU1      | DNA binding, transcription factor activity       | 2.8         | 2.5   |
| orf19.1344        |           | Unknown                                          | 2.6         | 4.0   |
| orf19.2210        |           | Unknown                                          | 8.6         | 2.6   |
| orf19.220         | PIR1      | structural constituent of cell wall              | 2.5         | 2.6   |
| orf19.100         |           | Unknown                                          | 3.0         | 2.2   |
| orf19.2175        |           | Unknown                                          | 5.0         | 3.7   |
| orf19.6117        |           | Unknown                                          | 2.7         | 3.3   |
| orf19.2846        |           | Unknown                                          | 4.4         | 2.3   |
| orf19.3900        |           | transporter activity                             | 2.0         | 2.6   |
| orf19.670.2       |           | Unknown                                          | 2.2         | 2.2   |
| orf19.5245        |           | Unknown                                          | 2.3         | 2.2   |
| orf19.5246        |           | Unknown                                          | 2.3         | 3.4   |
| orf19.5248        | MSO1      | Unknown                                          | 4.4         | 3.3   |
| orf19.5250        |           | Unknown                                          | 3.2         | 2.3   |
| orf19.5251        | ZCF30     | DNA binding, transcription activator activity    | 2.6         | 3.3   |
| orf19.4077        | MIT1      | mannosyltransferase activity                     | 5.5         | 6.1   |
| orf19.4090        |           | fucose:hydrogen symporter activity               | 2.0         | 2.1   |
| orf19.4097        |           | Unknown                                          | 2.1         | 2.7   |
| orf19.7204        |           | Unknown                                          | 3.1         | 2.4   |
| orf19.7184        |           | Unknown                                          | 2.3         | 2.0   |
| orf19.6899        |           | Unknown                                          | 2.7         | 2.4   |
| orf19.6660        |           | Unknown                                          | 2.5         | 4.5   |
| orf19.6680        | FGR27     | transcription factor activity                    | 2.1         | 2.4   |
| orf19.6627        |           | Unknown                                          | 2.3         | 3.2   |
| orf19.7410        |           | metalloendopeptidase activity                    | 2.4         | 2.1   |
| orf19.6781        |           | transcription factor activity                    | 2.9         | 3.5   |
| orf19.7300        |           | Unknown                                          | 2.4         | 2.7   |
| orf19.7296        |           | Unknown                                          | 3.0         | 4.3   |
| orf19.7442        |           | Unknown                                          | 3.2         | 3.0   |
| orf19.7445        |           | Unknown                                          | 2.3         | 2.0   |
| orf19.7457        |           | Unknown                                          | 3.6         | 3.1   |
| orf19.4286        |           | Unknown                                          | 2.3         | 2.3   |
| orf19.6980        |           | Unknown                                          | 2.6         | 2.3   |
| orf19.3282        | BMT3      | Unknown                                          | 3.2         | 3.0   |
| orf19.5029        | MODF      | ATP binding                                      | 3.0         | 3.2   |
| orf19.4445        |           | Unknown                                          | 2.4         | 4.5   |
| orf19.2870        |           | Unknown                                          | 3.6         | 2.2   |
| orf19.847         | YIM1      | endopeptidase activity                           | 2.4         | 2.3   |
| orf19.6758        |           | aldo-keto reductase activity                     | 3.5         | 2.5   |
| orf19.6757        | GCY1      | aldehyde reductase activity                      | 2.5         | 2.1   |
| orf19.6741        |           | Unknown                                          | 2.4         | 3.9   |
| orf19.7531        |           | Unknown                                          | 2.3         | 2.0   |
| orf19.6840        |           | Unknown                                          | 3.0         | 2.2   |
| orf19.6720        |           | Unknown                                          | 2.4         | 2.3   |
| orf19.899         |           | Unknown                                          | 2.3         | 2.0   |
| orf19.3021        |           | Unknown                                          | 2.7         | 4.1   |
| orf19.7521        | REP1      | Unknown                                          | 3.8         | 3.1   |
| orf19.5848        |           | Unknown                                          | 2.3         | 2.1   |
| orf19.27          |           | Unknown                                          | 3.8         | 2.9   |
| orf19.775         |           | Unknown                                          | 2.9         | 3.4   |
| orf19.6514        | CUP9      | chromatin binding, sequence-specific DNA binding | 2.7         | 4.6   |
| orf19.6508        |           | protein transporter activity                     | 3.6         | 4.5   |
| orf19.871         |           | protein transporter activity                     | 3.0         | 2.6   |
| orf19.2498        |           | Unknown                                          | 2.2         | 3.5   |
| orf19.6168        |           | structural constituent of cytoskeleton           | 2.1         | 2.1   |
| orf19.7504        |           | Unknown                                          | 2.9         | 2.4   |
| orf19.1861        |           | Unknown                                          | 2.3         | 2.0   |
| orf19.7504        |           | Unknown                                          | 4.2         | 3.2   |
| orf19.3841        |           | protein serine/threonine kinase activity         | 2.9         | 2.0   |
| orf19.3839        | SAP10     | Unknown                                          | 3.1         | 2.6   |
| orf19.2030        |           | Unknown                                          | 4.2         | 2.5   |

Fold Changes (SRR1 vs. Δsrr1)

| orf19 designation | Gene Name | Molecular function                                                                      | Δsrr1/Δsrr1 |       |
|-------------------|-----------|-----------------------------------------------------------------------------------------|-------------|-------|
|                   |           |                                                                                         | Exp 1       | Exp 2 |
| orf19.7497        |           | Unknown                                                                                 | 2.1         | 2.0   |
| orf19.537         |           | Unknown                                                                                 | 2.1         | 2.5   |
| orf19.532         | RBR2      | structural constituent of cell wall                                                     | 2.9         | 2.2   |
| orf19.5908        | TEC1      | specific RNA polymerase II transcription factor activity                                | 2.0         | 3.6   |
| orf19.1473        |           | Unknown                                                                                 | 2.9         | 3.5   |
| orf19.1477        |           | Unknown                                                                                 | 2.9         | 2.0   |
| orf19.4706        |           | Unknown                                                                                 | 4.3         | 4.6   |
| orf19.905         | AVT7      | Unknown                                                                                 | 2.5         | 2.9   |
| orf19.6522        |           | anion:cation symporter activity                                                         | 2.7         | 3.1   |
| orf19.1847        |           | Unknown                                                                                 | 2.1         | 2.3   |
| orf19.1847        | ARO10     | carboxy-lyase activity, phenylpyruvate decarboxylase activity                           | 2.1         | 2.3   |
| orf19.5282        |           | Unknown                                                                                 | 2.0         | 2.8   |
| orf19.3740        | PGA23     | Unknown                                                                                 | 2.9         | 2.1   |
| orf19.5994        | RHB1      | GTPase activity                                                                         | 2.2         | 3.4   |
| orf19.7672        |           | Unknown                                                                                 | 2.4         | 2.2   |
| orf19.3674        | GAL102    | UDP-glucose 4-epimerase activity                                                        | 3.9         | 2.2   |
| orf19.5963        |           | Unknown                                                                                 | 2.3         | 2.4   |
| orf19.3004        |           | Unknown                                                                                 | 3.1         | 2.6   |
| orf19.7092        |           | Unknown                                                                                 | 2.0         | 2.2   |
| orf19.5683        |           | Unknown                                                                                 | 2.9         | 4.1   |
| orf19.4430        |           | Unknown                                                                                 | 2.1         | 2.0   |
| orf19.5961        |           | Unknown                                                                                 | 2.2         | 2.1   |
| orf19.4951        |           | Unknown                                                                                 | 2.4         | 2.2   |
| orf19.3309        |           | Unknown                                                                                 | 3.6         | 3.7   |
| orf19.6941        |           | diacylglycerol O-acyltransferase activity                                               | 2.1         | 2.5   |
| orf19.449         |           | Unknown                                                                                 | 2.3         | 3.4   |
| orf19.1486        |           | Unknown                                                                                 | 2.1         | 2.0   |
| orf19.4614        |           | protein complex scaffold                                                                | 2.1         | 2.1   |
| orf19.1767        |           | ubiquitin-specific protease activity                                                    | 2.6         | 2.2   |
| orf19.4174        |           | nucleoside transmembrane transporter activity                                           | 2.4         | 2.6   |
| orf19.3292        |           | peptide-methionine (R)-S-oxide reductase activity                                       | 2.2         | 2.2   |
| orf19.1112        | BUD7      | Unknown                                                                                 | 2.3         | 2.2   |
| orf19.2724        |           | Unknown                                                                                 | 3.5         | 3.6   |
| orf19.3863        |           | Unknown                                                                                 | 2.1         | 2.1   |
| orf19.6704        |           | Unknown                                                                                 | 2.5         | 2.2   |
| orf19.1307        |           | Unknown                                                                                 | 3.3         | 2.6   |
| orf19.7598        |           | Unknown                                                                                 | 2.0         | 2.0   |
| orf19.7596        |           | Unknown                                                                                 | 4.5         | 2.9   |
| orf19.319         |           | Unknown                                                                                 | 3.0         | 2.5   |
| orf19.320         |           | Unknown                                                                                 | 36.6        | 36.3  |
| orf19.5587        |           | Unknown                                                                                 | 3.1         | 2.6   |
| orf19.7590        |           | Unknown                                                                                 | 2.3         | 27.0  |
| orf19.3814        |           | Unknown                                                                                 | 2.8         | 3.8   |
| orf19.3813        |           | Unknown                                                                                 | 3.1         | 27.5  |
| orf19.3818        | GOA1      | Unknown                                                                                 | 3.3         | 2.7   |
| orf19.2770        |           | Unknown                                                                                 | 3.9         | 2.7   |
| orf19.3435        |           | Unknown                                                                                 | 2.2         | 6.2   |
| orf19.3434        |           | Unknown                                                                                 | 2.2         | 3.8   |
| orf19.4043        |           | transcription factor activity                                                           | 2.4         | 2.4   |
| orf19.2789        |           | Unknown                                                                                 | 2.2         | 2.3   |
| orf19.3728        |           | protein phosphatase 1 binding                                                           | 2.0         | 2.1   |
| orf19.577         |           | Unknown                                                                                 | 2.0         | 2.4   |
| orf19.1800        |           | Unknown                                                                                 | 2.2         | 2.0   |
| orf19.4530.1      |           | Unknown                                                                                 | 2.6         | 2.5   |
| orf19.4531        |           | ATP binding, ATPase activity                                                            | 2.7         | 2.1   |
| orf19.860         | BMT8      | Unknown                                                                                 | 2.1         | 2.1   |
| orf19.4056        | GAT2      | transcription factor activity                                                           | 4.4         | 3.5   |
| orf19.5337        | UBC15     | Unknown                                                                                 | 2.3         | 2.2   |
| orf19.3131        | OYE32     | NADPH dehydrogenase activity                                                            | 2.1         | 2.8   |
| orf19.1449        |           | Unknown                                                                                 | 2.7         | 2.4   |
| orf19.6606        |           | Unknown                                                                                 | 3.4         | 2.0   |
| orf19.6605        |           | Unknown                                                                                 | 2.9         | 2.2   |
| orf19.2693        | GST2      | transcription corepressor activity                                                      | 2.4         | 2.8   |
| orf19.4543        | UGA2      | succinate-semialdehyde dehydrogenase [NAD(P)+] activity                                 | 2.7         | 2.2   |
| orf19.2933        |           | ubiquitin-specific protease activity                                                    | 2.5         | 2.9   |
| orf19.527         |           | Unknown                                                                                 | 2.0         | 2.0   |
| orf19.1719        | SGA1      | glucan 1,4-alpha-glucosidase activity                                                   | 2.7         | 3.0   |
| orf19.7228        |           | Unknown                                                                                 | 2.2         | 2.1   |
| orf19.5862        |           | arginase activity                                                                       | 2.0         | 7.3   |
| orf19.3705        | PTC6      | protein serine/threonine phosphatase activity                                           | 2.3         | 2.0   |
| orf19.3706        |           | Unknown                                                                                 | 2.3         | 2.1   |
| orf19.1797        |           | Unknown                                                                                 | 2.3         | 3.1   |
| orf19.1793        |           | phosphoinositide binding                                                                | 2.4         | 2.4   |
| orf19.4279        | MNN1      | alpha-1,3-mannosyltransferase activity                                                  | 2.2         | 2.4   |
| orf19.822         |           | Unknown                                                                                 | 2.0         | 6.5   |
| orf19.4903        |           | N-acetylglucosaminylphosphatidylinositol deacetylase activity                           | 2.8         | 2.0   |
| orf19.7210        |           | Unknown                                                                                 | 2.6         | 3.9   |
| orf19.4898        |           | Unknown                                                                                 | 2.2         | 2.5   |
| orf19.4894        |           | Unknown                                                                                 | 2.8         | 2.6   |
| orf19.496         |           | DNA-dependent ATPase activity, guanine/thymine mispair binding                          | 2.0         | 2.7   |
| orf19.1369        |           | Unknown                                                                                 | 2.9         | 2.3   |
| orf19.881         | DFG16     | Unknown                                                                                 | 3.2         | 2.2   |
| orf19.879         |           | myosin binding                                                                          | 2.1         | 2.0   |
| orf19.203         | STB3      | sequence-specific DNA binding                                                           | 3.1         | 3.2   |
| orf19.2838        |           | Unknown                                                                                 | 3.1         | 2.7   |
| orf19.6249        | HAK1      | potassium ion transmembrane transporter activity                                        | 4.0         | 4.4   |
| orf19.6245        |           | Unknown                                                                                 | 2.8         | 2.4   |
| orf19.3187        | ZNC1      | transcription factor activity, specific RNA polymerase II transcription factor activity | 2.2         | 2.1   |
| orf19.3677        |           | contributes to Atg8 ligase activity                                                     | 2.1         | 2.3   |
| orf19.3679        |           | Unknown                                                                                 | 2.0         | 2.5   |
| orf19.3712        |           | Unknown                                                                                 | 2.0         | 2.5   |
| orf19.6143        |           | Unknown                                                                                 | 2.2         | 3.4   |
| orf19.6141        | HGT16     | glucose transmembrane transporter activity                                              | 3.0         | 2.3   |
| orf19.5808        |           | Unknown                                                                                 | 2.1         | 2.3   |
| orf19.5813        |           | Unknown                                                                                 | 2.4         | 2.6   |
| orf19.7567        |           | Unknown                                                                                 | 3.8         | 7.4   |
| orf19.6888        |           | Unknown                                                                                 | 5.7         | 6.8   |

| orf19 designation | Gene Name   | Molecular function                   | Fold Changes ( <i>SRR1</i> vs. $\Delta$ <i>srr1</i> ) |       |
|-------------------|-------------|--------------------------------------|-------------------------------------------------------|-------|
|                   |             |                                      | $\Delta$ <i>srr1</i> / <i>srr1</i>                    |       |
|                   |             |                                      | Exp 1                                                 | Exp 2 |
| orf19.4372        |             | Unknown                              | 4.1                                                   | 3.2   |
| orf19.4070        |             | Unknown                              | 2.2                                                   | 2.7   |
| orf19.6881        | <i>YTH1</i> | RNA binding                          | 2.3                                                   | 2.4   |
| orf19.3644        |             | Unknown                              | 2.8                                                   | 3.5   |
| orf19.744         | <i>GDB1</i> | glycogen debranching enzyme activity | 2.4                                                   | 2.4   |
| orf19.3499        |             | Unknown                              | 4.8                                                   | 2.6   |
| orf19.4525        |             | Unknown                              | 2.5                                                   | 2.4   |
